# Supplementary material
Source: PubMed Central journal article supplement (PMC2653059)
Supplement: NIHMS86403-supplement-1_si_001.pdf [file NIHMS86403-supplement-1_si_001.pdf]

The Curtius Rearrangement of Cyclopropyl- and Cyclopropenoyl Azides. A  
Combined Theoretical and Experimental Mechanistic Study

*Vinod Tarwade, Olga Dmitrenko, Robert D. Bach\* and Joseph M. Fox\**

Department of Chemistry and Biochemistry, University of Delaware, Newark, DE 19716

Supporting Information

|                                                                   |           |
|-------------------------------------------------------------------|-----------|
| Kinetic plots for the Curtius Rearrangement of <b>1</b> at 303 K  | page S-2  |
| Error Analysis for the Curtius Rearrangement of <b>1</b> at 303 K | page S-3  |
| Kinetic plots for the Curtius Rearrangement of <b>1</b> at 313 K  | page S-4  |
| Error Analysis for the Curtius Rearrangement of <b>1</b> at 313 K | page-S-5  |
| Kinetic plots for the Curtius Rearrangement of <b>1</b> at 323 K  | page S-6  |
| Error Analysis for the Curtius Rearrangement of <b>1</b> at 323 K | page-S-7  |
| Arrhenius Plot for rearrangement of <b>1</b> to <b>2</b>          | page S-8  |
| Eyring Plot for rearrangement of <b>1</b> to <b>2</b>             | page S-9  |
| Kinetic plots for the Curtius Rearrangement of <b>3</b> at 323 K  | page S-10 |
| Error Analysis for the Curtius Rearrangement of <b>3</b> at 323 K | page S-11 |
| Kinetic plots for the Curtius Rearrangement of <b>3</b> at 334 K  | page S-12 |
| Error Analysis for the Curtius Rearrangement of <b>3</b> at 334 K | page S-13 |
| Kinetic plots for the Curtius Rearrangement of <b>3</b> at 344 K  | page S-14 |
| Error Analysis for the Curtius Rearrangement of <b>3</b> at 344 K | page S-15 |
| Arrhenius Plot for rearrangement of <b>3</b> to <b>4</b>          | page S-16 |
| Eyring Plot for rearrangement of <b>3</b> to <b>4</b>             | page S-17 |
| <sup>1</sup> H NMR and <sup>13</sup> C NMR spectra of <b>1</b>    | page S-18 |
| <sup>1</sup> H NMR and <sup>13</sup> C NMR spectra of <b>2</b>    | page S-19 |
| <sup>1</sup> H NMR and <sup>13</sup> C NMR spectra of <b>3</b>    | page S-20 |
| <sup>1</sup> H NMR and <sup>13</sup> C NMR spectra of <b>4</b>    | page S-21 |
| Computational Details                                             | page S-22 |

Kinetic plots for the Curtius Rearrangement of **1** at 303 K

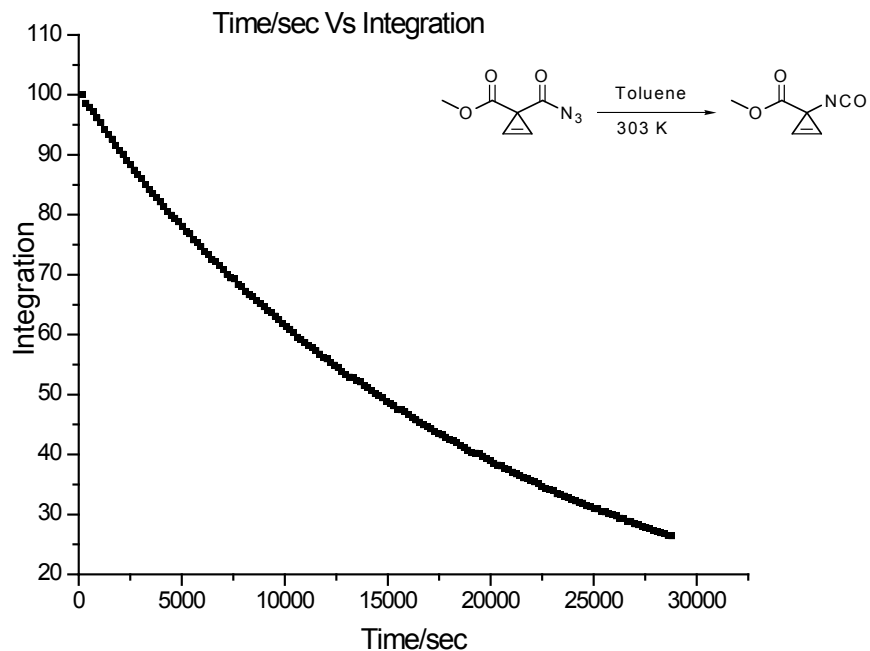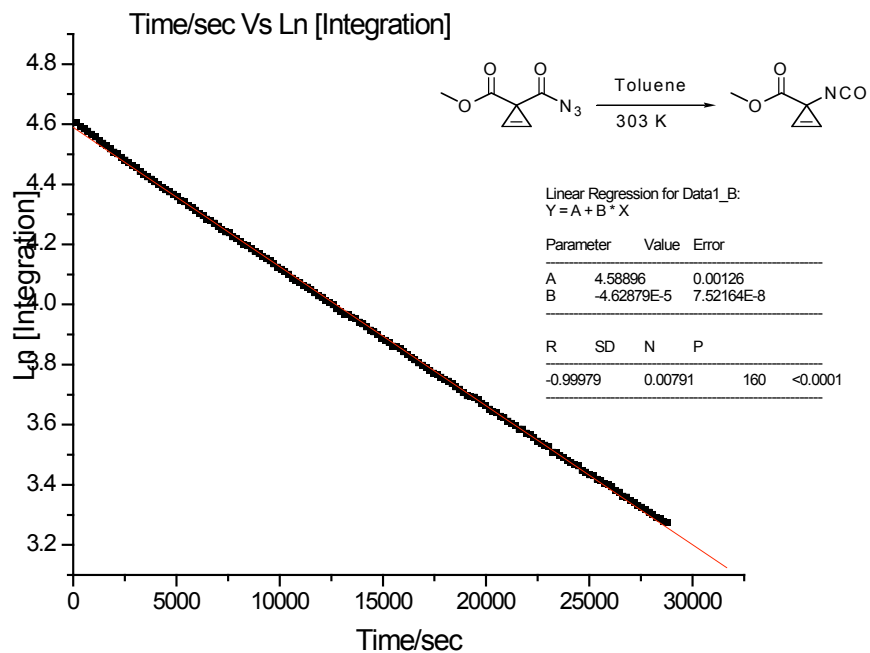

$$\ln [A] = -kt + \ln [A_0]$$

$$k = 4.63 \times 10^{-5}: \text{First Data Set}$$

$$k = 4.53 \times 10^{-5}: \text{Second Data Set}$$

Error Analysis for the Curtius Rearrangement of **1** at 303 K

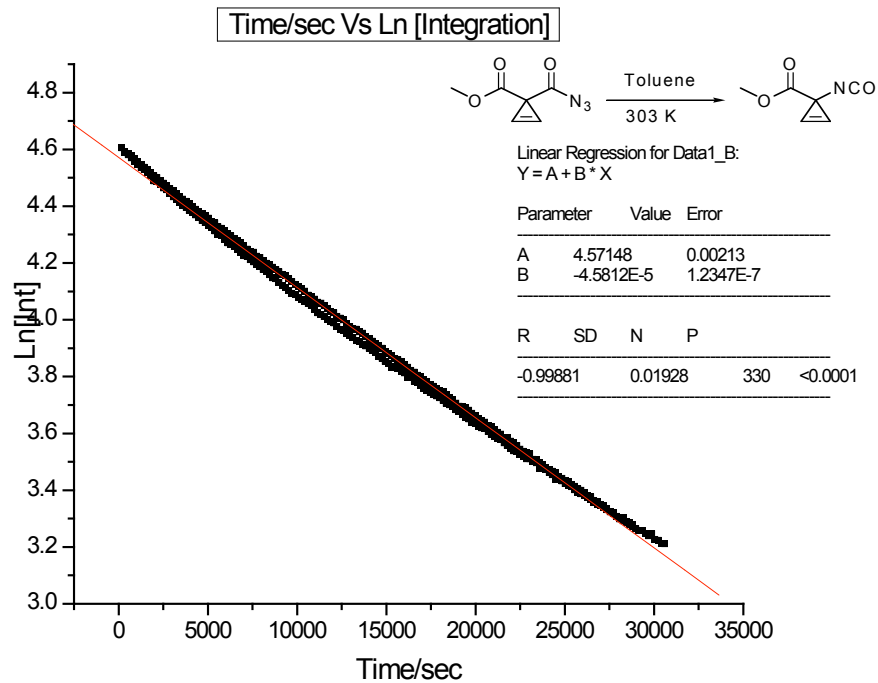

$$\ln [A] = -kt + \ln [A_0]$$

$$k = 4.58 (0.22)^a \times 10^{-5} : \text{Average from two data sets.}$$

<sup>a</sup> The sample standard deviation is given in parenthesis, and was calculated from the Standard Error of the above plot.

Kinetic plots for the Curtius Rearrangement of **1** at 313 K

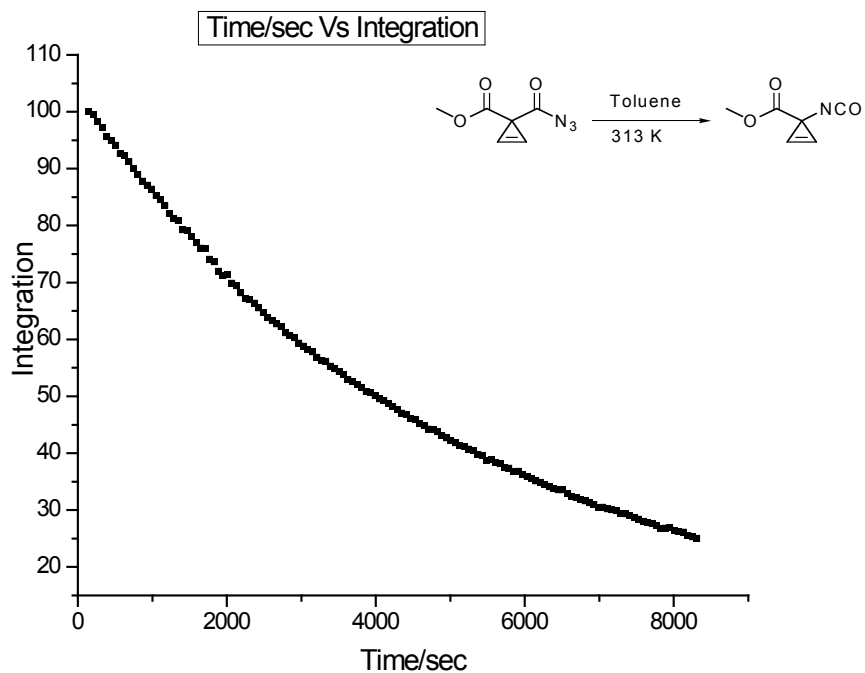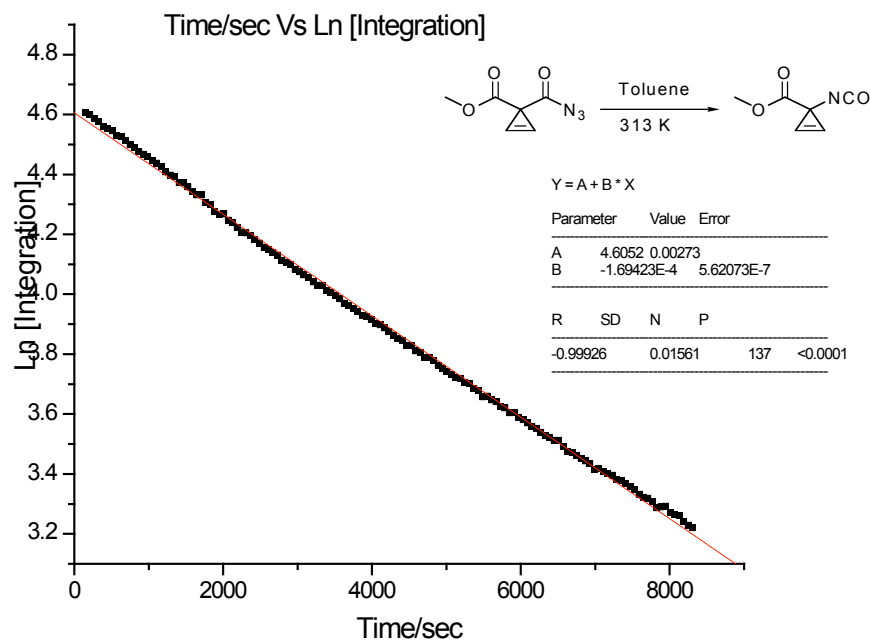

$$\ln [A] = -kt + \ln [A_0]$$

$$k = 1.69 \times 10^{-4}: \text{First Data Set}$$

$$k = 1.83 \times 10^{-4}: \text{Second Data Set}$$

## Error Analysis for the Curtius Rearrangement of **1** at 313 K

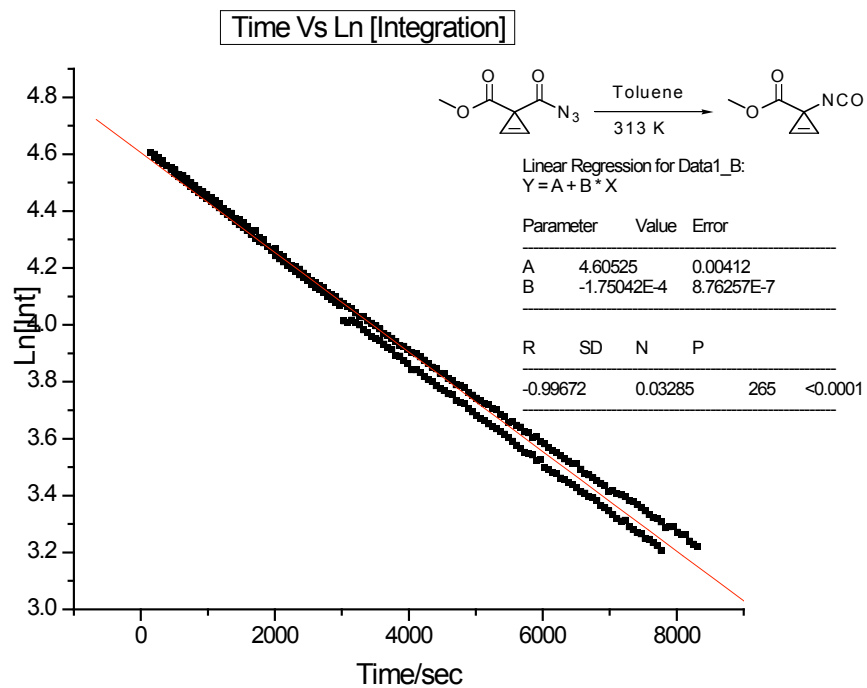

$$\ln [A] = -kt + \ln [A_0]$$

$$k = 1.75 (0.14)^a \times 10^{-4} : \text{Average from two data sets.}$$

<sup>a</sup> The sample standard deviation is given in parenthesis, and was calculated from the Standard Error of the above plot.

Kinetic plots for the Curtius Rearrangement of **1** at 323 K

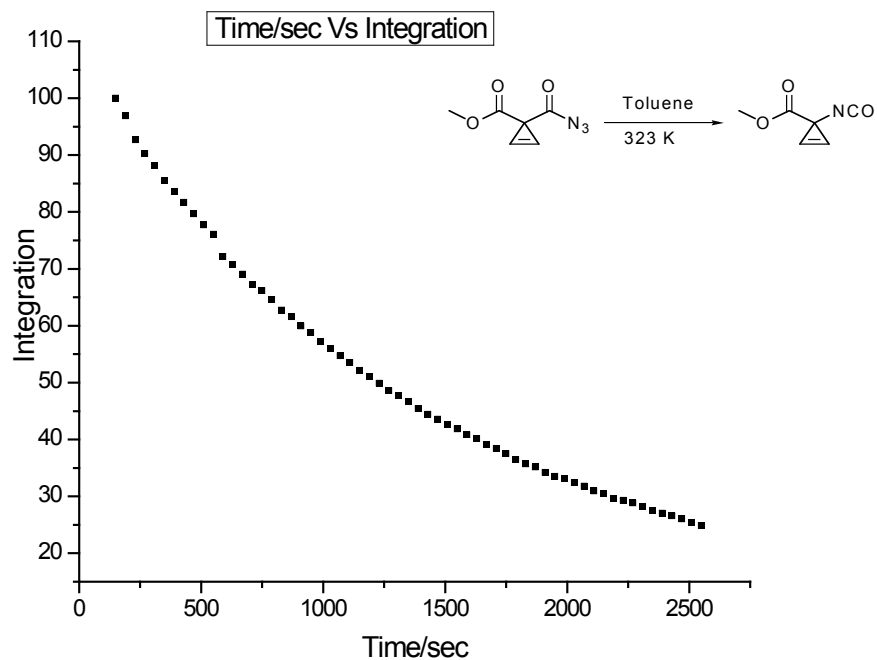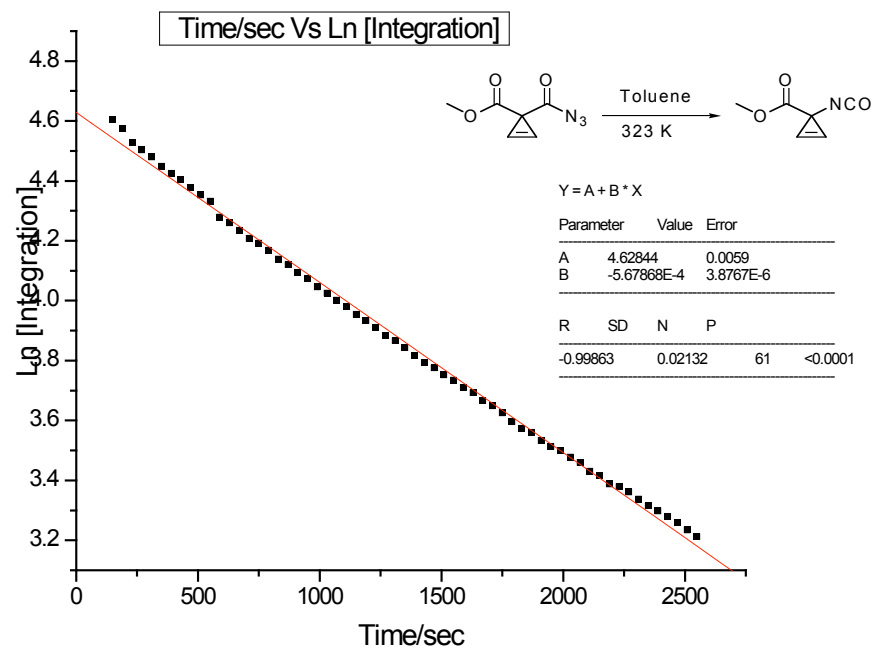

$$\ln [A] = -kt + \ln [A_0]$$

$$k = 5.68 \times 10^{-4}: \text{First Data Set}$$

$$k = 5.63 \times 10^{-4}: \text{Second Data Set}$$

## Error Analysis for the Curtius Rearrangement of **1** at 323 K

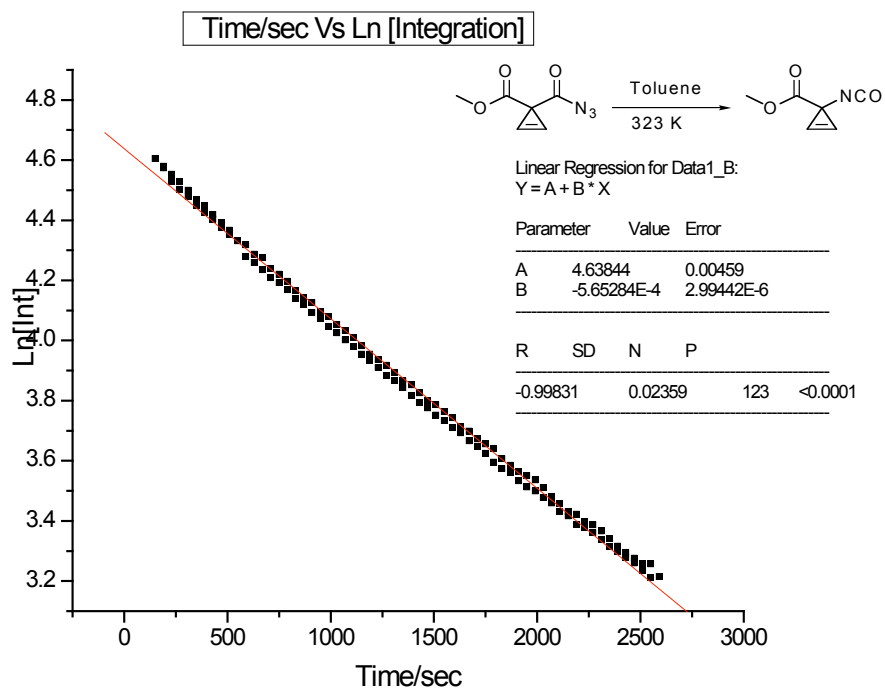

$$\ln [A] = -kt + \ln [A_0]$$

$$k = 5.65 (0.33)^a \times 10^{-4} : \text{Average from two data sets.}$$

<sup>a</sup> The sample standard deviation is given in parenthesis, and was calculated from the Standard Error of the above plot.

## Arrhenius Plot for rearrangement of **1** to **2**

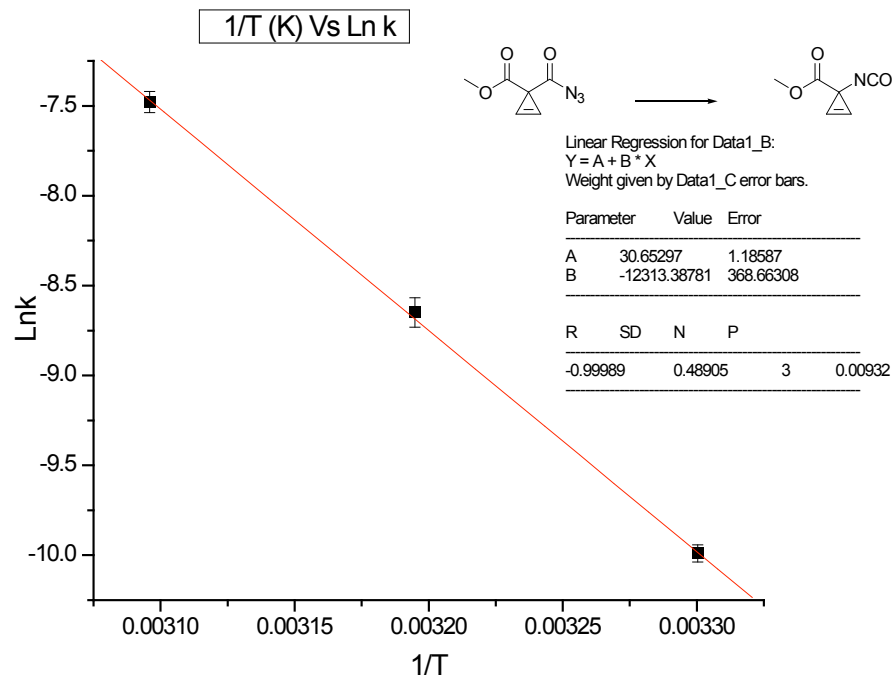

$$\ln k = \frac{-E_a}{R} \left( \frac{1}{T} \right) + \ln A$$

$$\frac{-E_a}{R} = -12313.39 \text{ (637.78)}^a$$

$$E_a = 102373.52 \text{ (5302.95) Joules/mol}$$

$$= 24.5 \text{ (1.3) Kcal/mol}$$

<sup>a</sup> The sample standard deviation is given in parenthesis, and was calculated from the Std. Error of the above plot.



## Eyring Plot for rearrangement of **1** to **2**

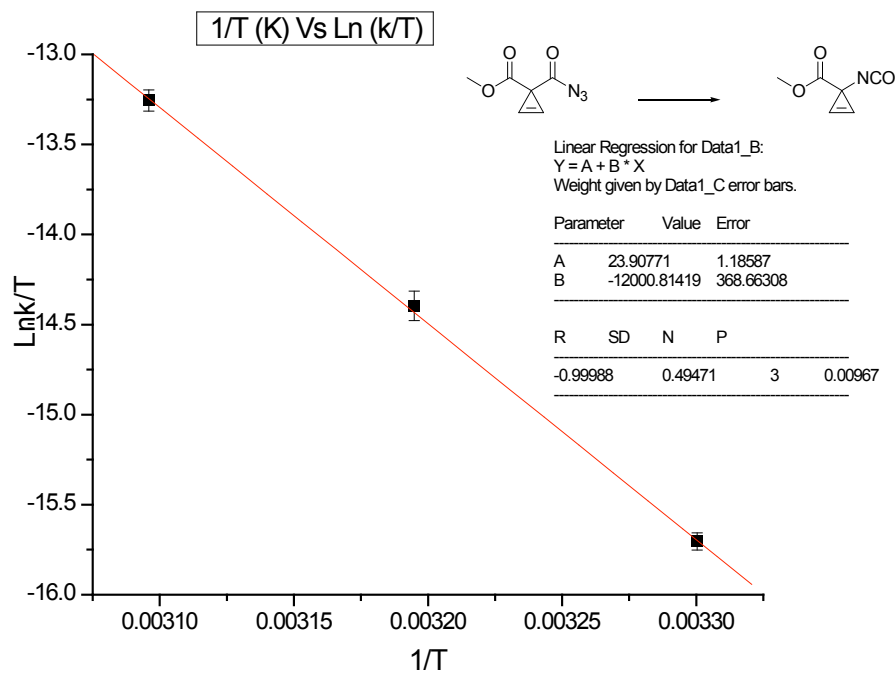

$$\ln \frac{k}{T} = \frac{-\Delta H^\ddagger}{R} \left( \frac{1}{T} \right) + \ln \frac{k_B}{h} + \frac{\Delta S^\ddagger}{R}$$

$$\frac{-\Delta H^\ddagger}{R} = -12000.81 \text{ (637.78)}^a$$

$$\Delta H^\ddagger = 99774.73 \text{ (5298.04) Joules/mol}$$

$$= 23.9 \text{ (1.3) Kcal/mol}$$

$$\Delta S^\ddagger = 0.28 \text{ (4.08) cal/mol/K}$$

<sup>a</sup> The sample standard deviation is given in parenthesis, and was calculated from the Std. Error of the above plot.

Kinetic plots for the Curtius Rearrangement of **3** at 323 K

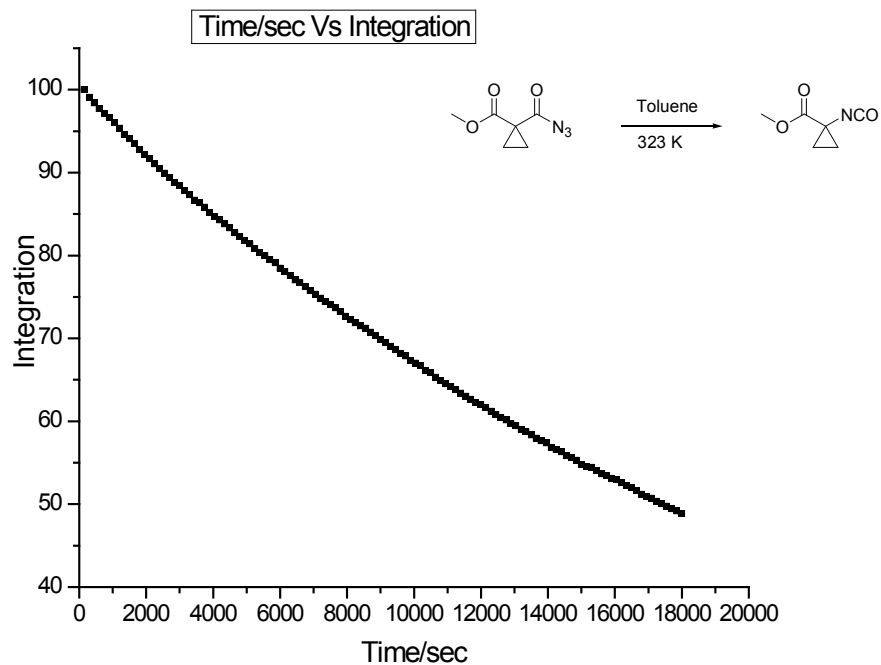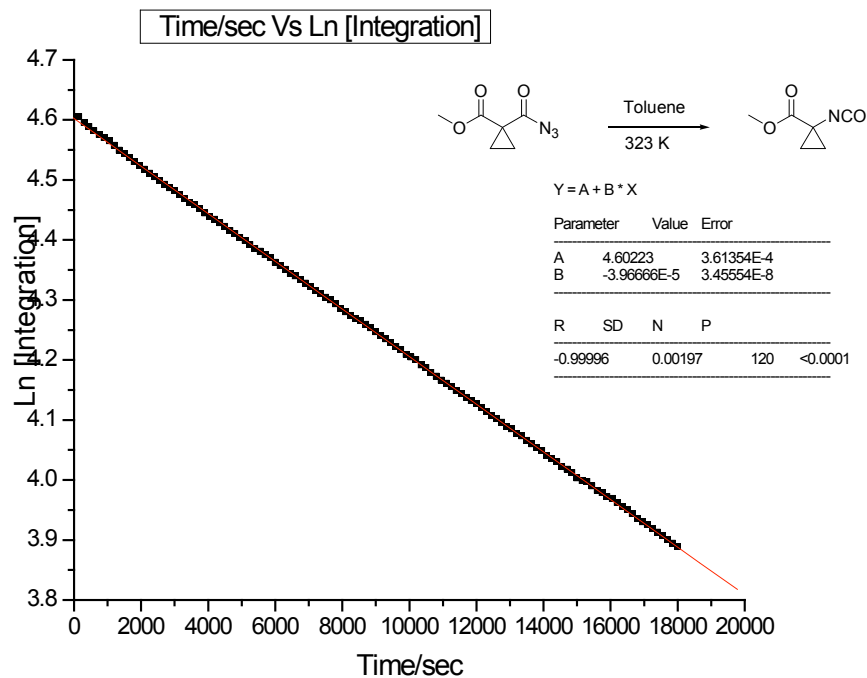

$$\ln [A] = -kt + \ln [A_0]$$

$$k = 3.97 \times 10^{-5}: \text{First Data Set}$$

$$k = 3.94 \times 10^{-5}: \text{Second Data Set}$$

## Error Analysis for the Curtius Rearrangement of **3** at 323 K

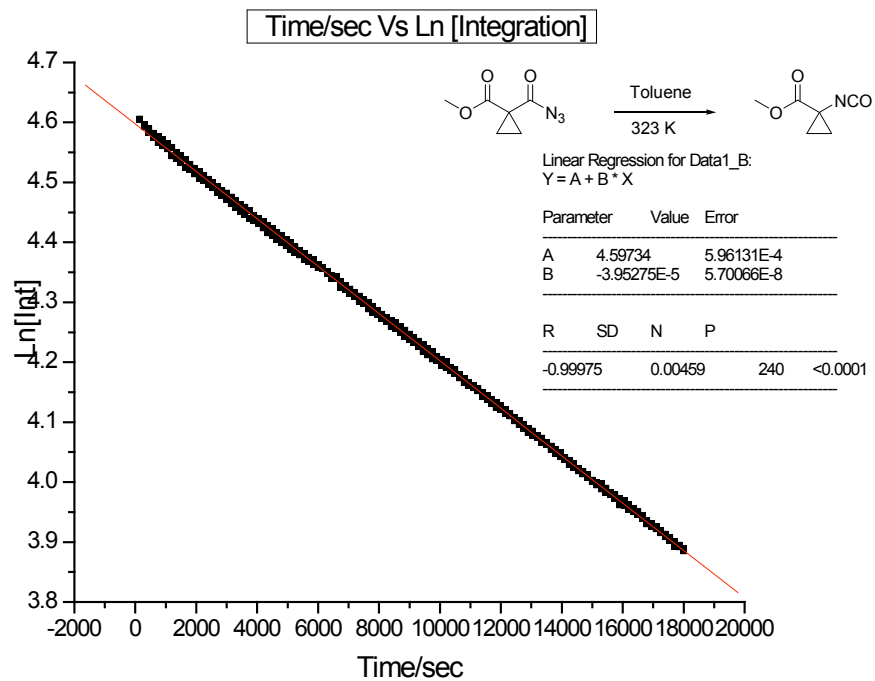

$$\ln [A] = -kt + \ln [A_0]$$

$$k = 3.95 (0.09)^a \times 10^{-5} : \text{Average from two data sets.}$$

<sup>a</sup> The sample standard deviation is given in parenthesis, and was calculated from the Standard Error of the above plot.

Kinetic plots for the Curtius Rearrangement of **3** at 334 K

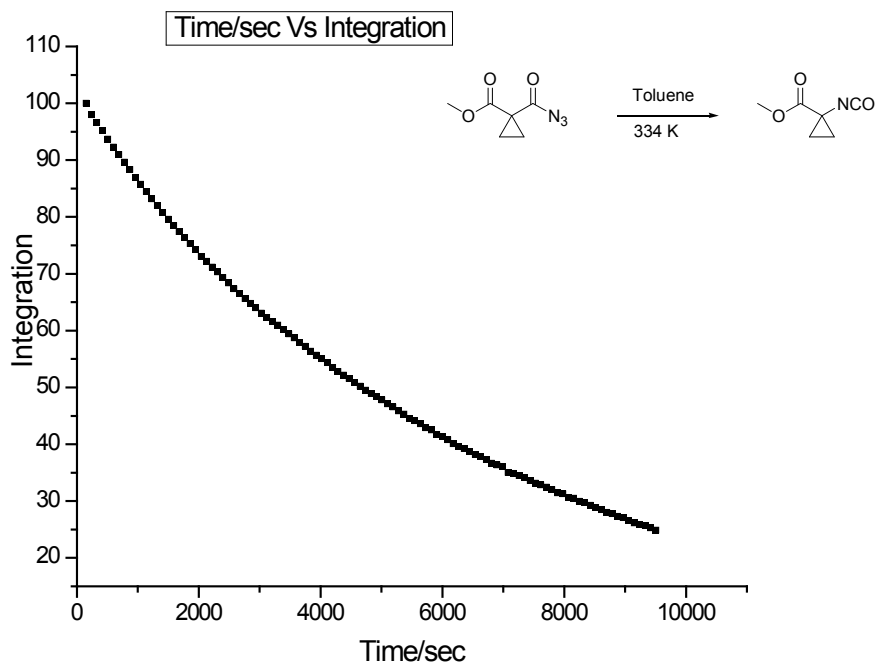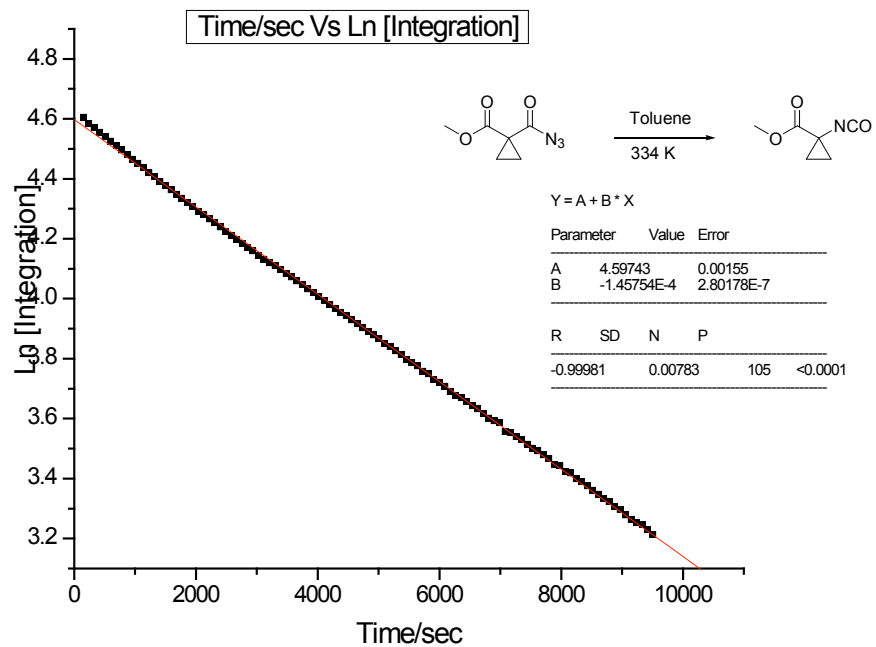

$$\ln [A] = -kt + \ln [A_0]$$

$$k = 1.46 \times 10^{-4}: \text{First Data Set}$$

$$k = 1.58 \times 10^{-4}: \text{Second Data Set}$$

## Error Analysis for the Curtius Rearrangement of **3** at 334 K

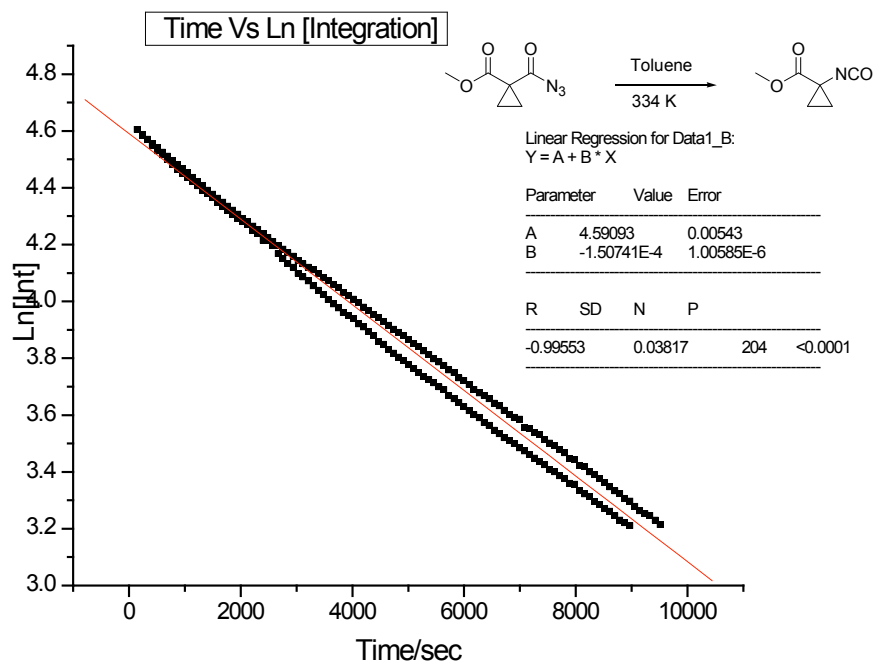

$$\ln [A] = -kt + \ln [A_0]$$

$$k = 1.51 (0.14)^a \times 10^{-4} : \text{Average from two data sets.}$$

<sup>a</sup> The sample standard deviation is given in parenthesis, and was calculated from the Standard Error of the above plot.

Kinetic plots for the Curtius Rearrangement of **3** at 344 K

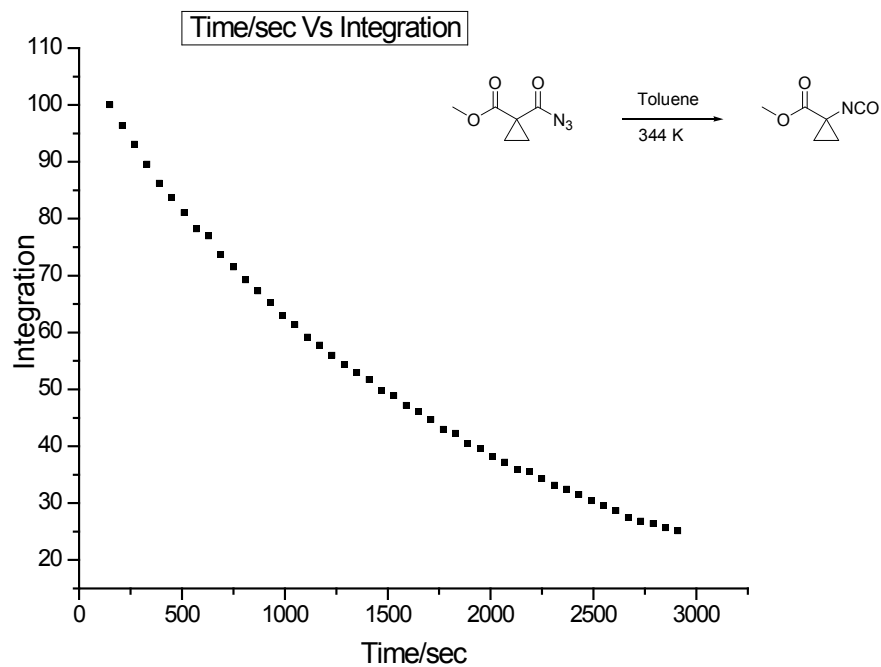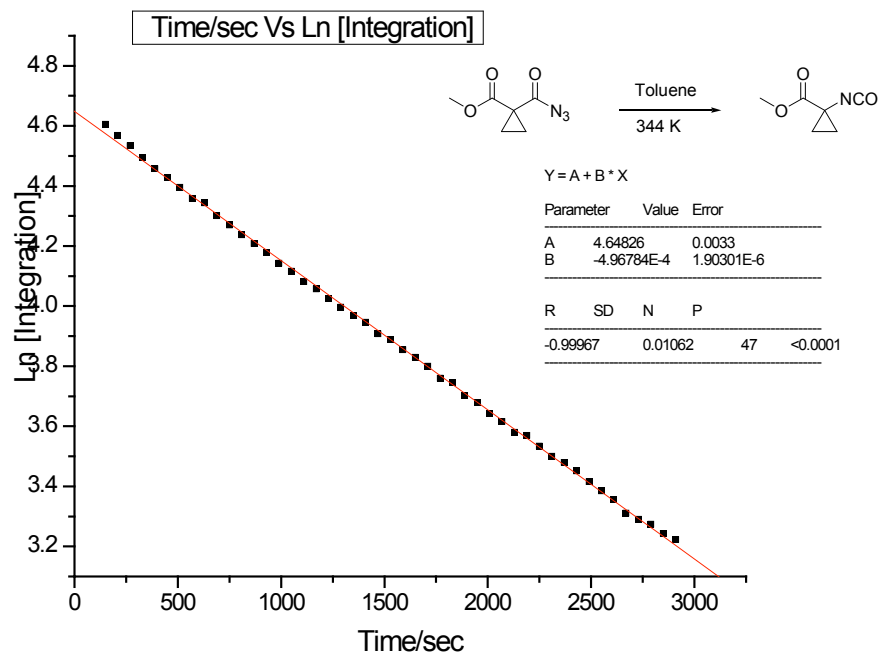

$$\ln [A] = -kt + \ln [A_0]$$

$k = 4.97 \times 10^{-4}$ : First Data Set

$k = 4.64 \times 10^{-4}$ : Second Data Set

Error Analysis of the kinetic plots for the Curtius Rearrangement of **3** at 344 K

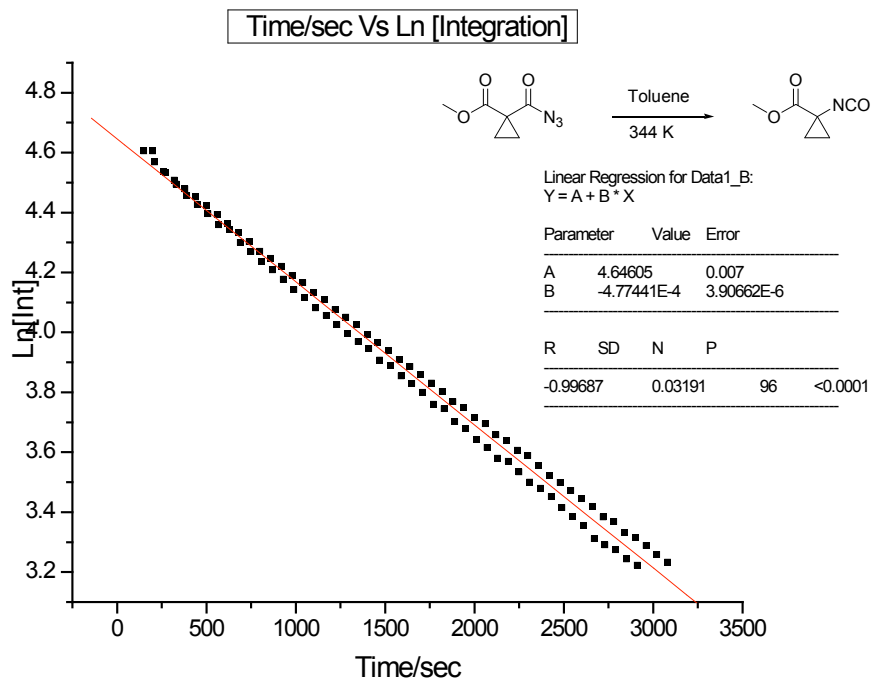

$$\ln [A] = -kt + \ln [A_0]$$

$$k = 4.77 (0.38)^a \times 10^{-4} : \text{Average from two data sets.}$$

<sup>a</sup> The sample standard deviation is given in parenthesis, and was calculated from the Standard Error of the above plot.

### Arrhenius Plot for rearrangement of **3** to **4**

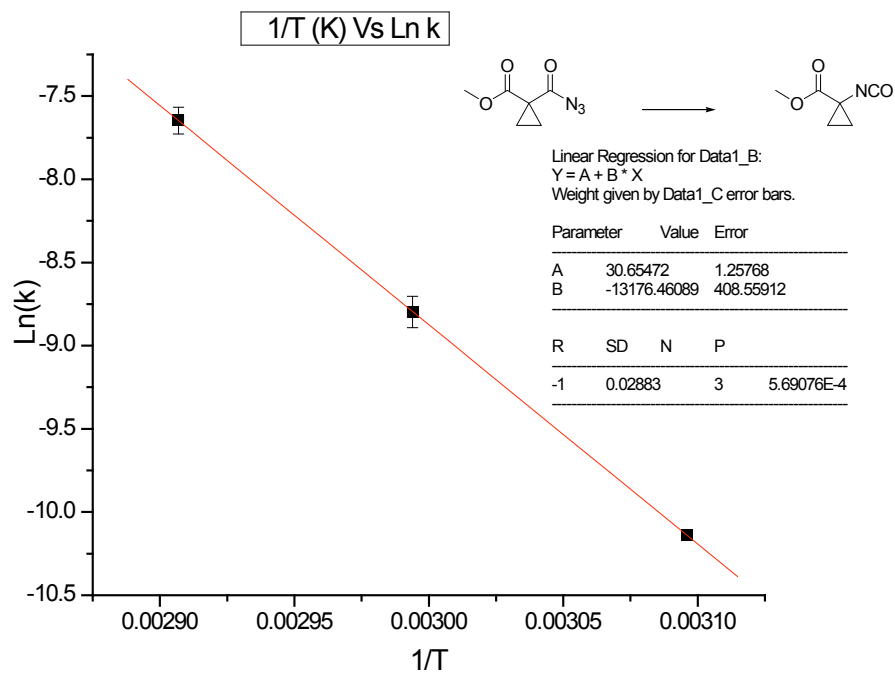

$$\ln k = \frac{-E_a}{R} \left( \frac{1}{T} \right) + \ln A$$

$$\frac{-E_a}{R} = -13176.46 \text{ (706.81)}^a$$

$$E_a = 109549.08 \text{ (5871.83) Joules/mol}$$

$$= 26.2 \text{ (1.4) Kcal/mol}$$

<sup>a</sup> The sample standard deviation is given in parenthesis, and was calculated from the Standard Error of the above plot.



### Eyring Plot for rearrangement of **3** to **4**

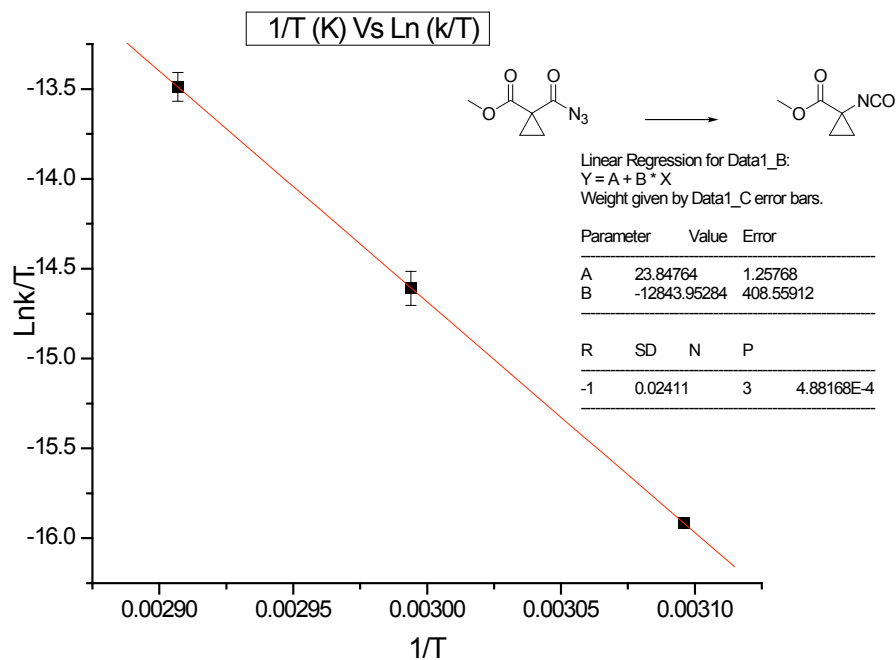

$$\ln \frac{k}{T} = \frac{-\Delta H^\ddagger}{R} \left( \frac{1}{T} \right) + \ln \frac{k_B}{h} + \frac{\Delta S^\ddagger}{R}$$

$$\frac{-\Delta H^\ddagger}{R} = -12843.95 \text{ (706.81)}^a$$

$$\Delta H^\ddagger = 106784.60 \text{ (5873.15) Joules/mol}$$

$$= 25.5 \text{ (1.4) Kcal/mol}$$

$$\Delta S^\ddagger = 0.18 \text{ (4.47) cal/mol/K}$$

<sup>a</sup> The sample standard deviation is given in parenthesis, and was calculated from the Standard Error of the above plot.

<sup>1</sup>H NMR spectrum of **1** (contaminated by 10% of **2**)  
(400 MHz, CDCl<sub>3</sub>)

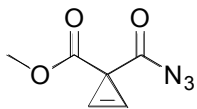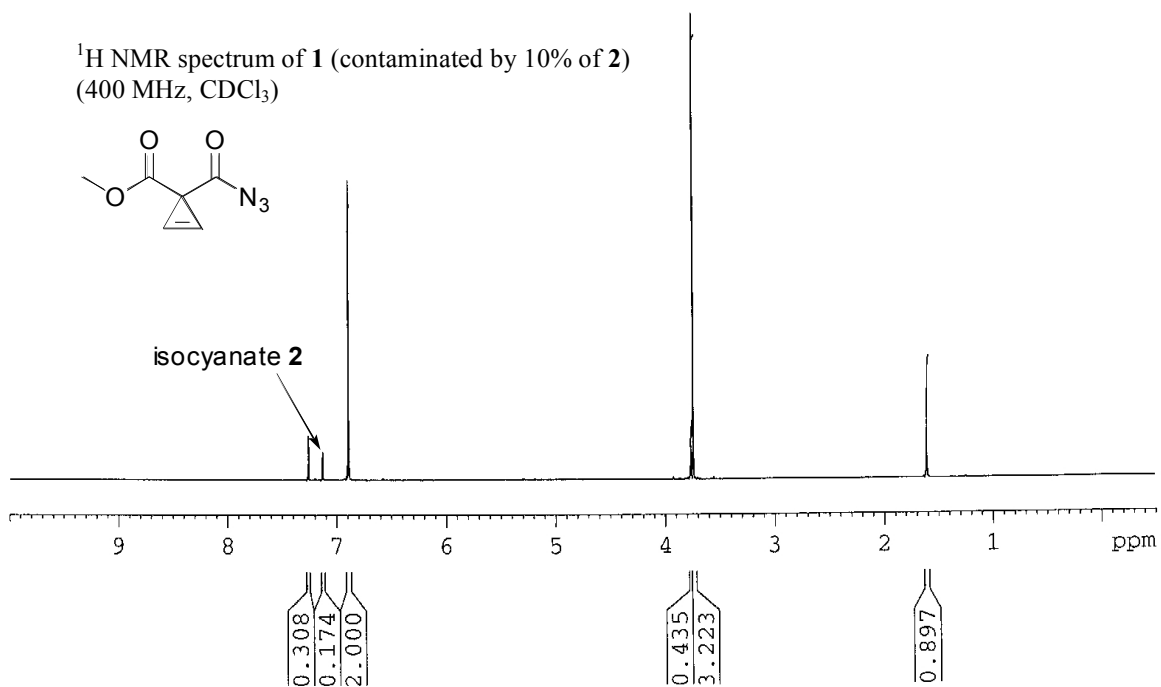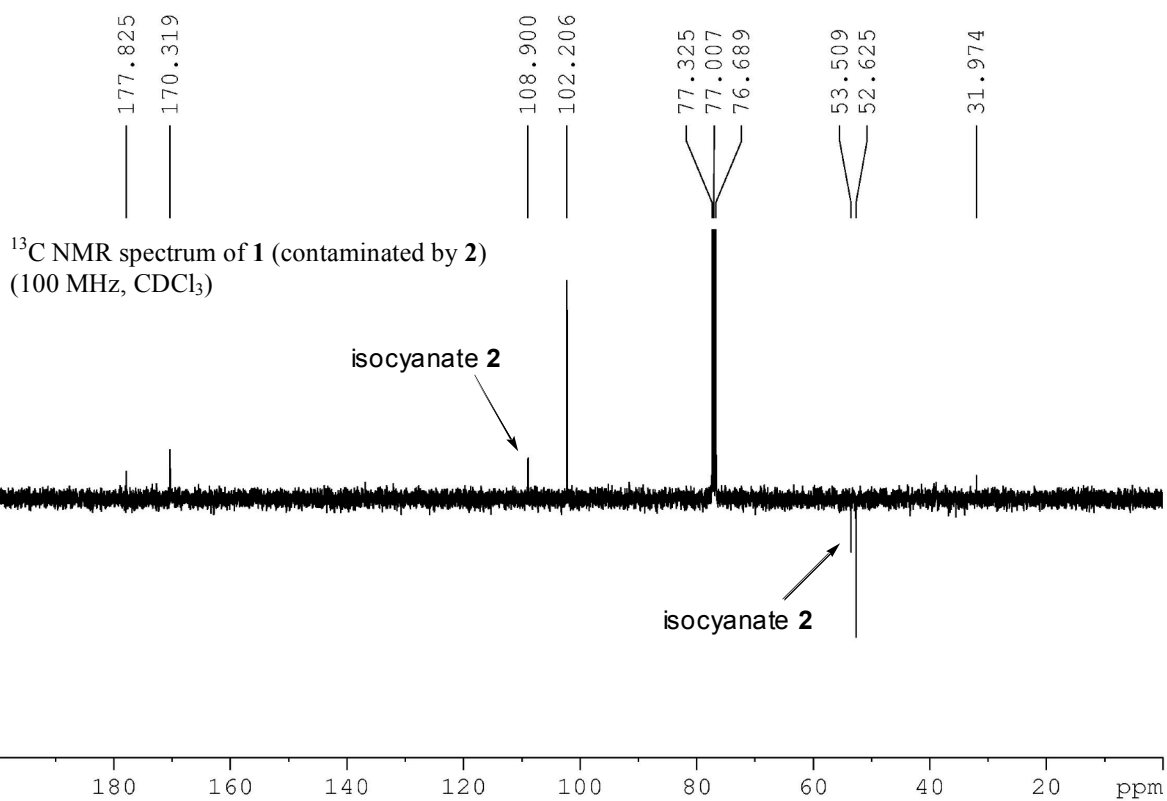

<sup>1</sup>H NMR spectrum of **2**  
(400 MHz, CDCl<sub>3</sub>)

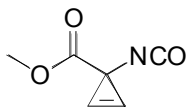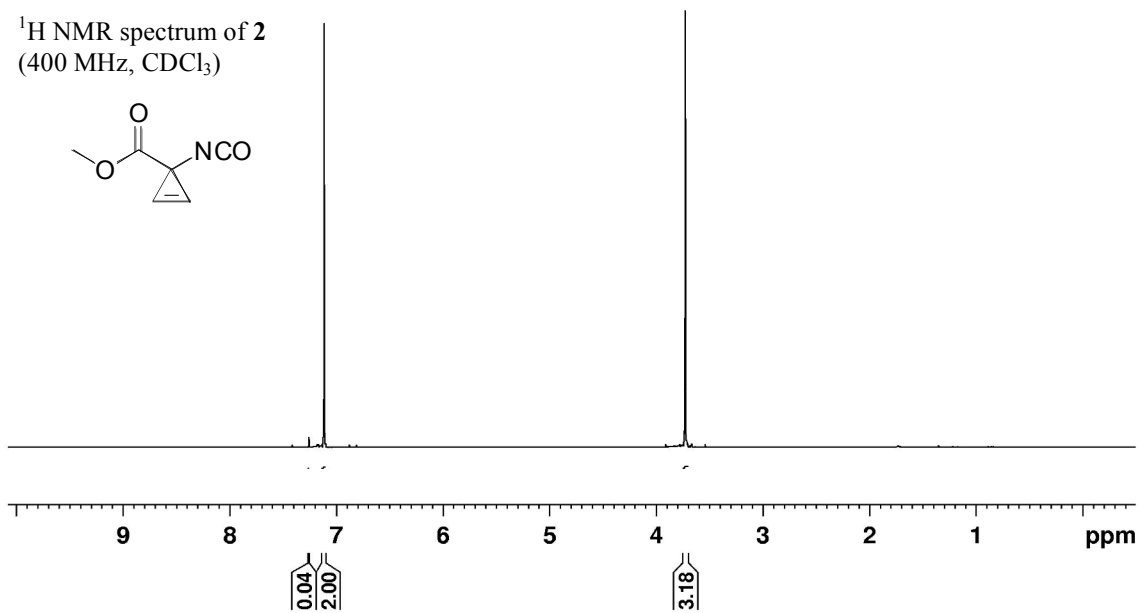

<sup>13</sup>C NMR spectrum of **2**  
(100 MHz, CDCl<sub>3</sub>)

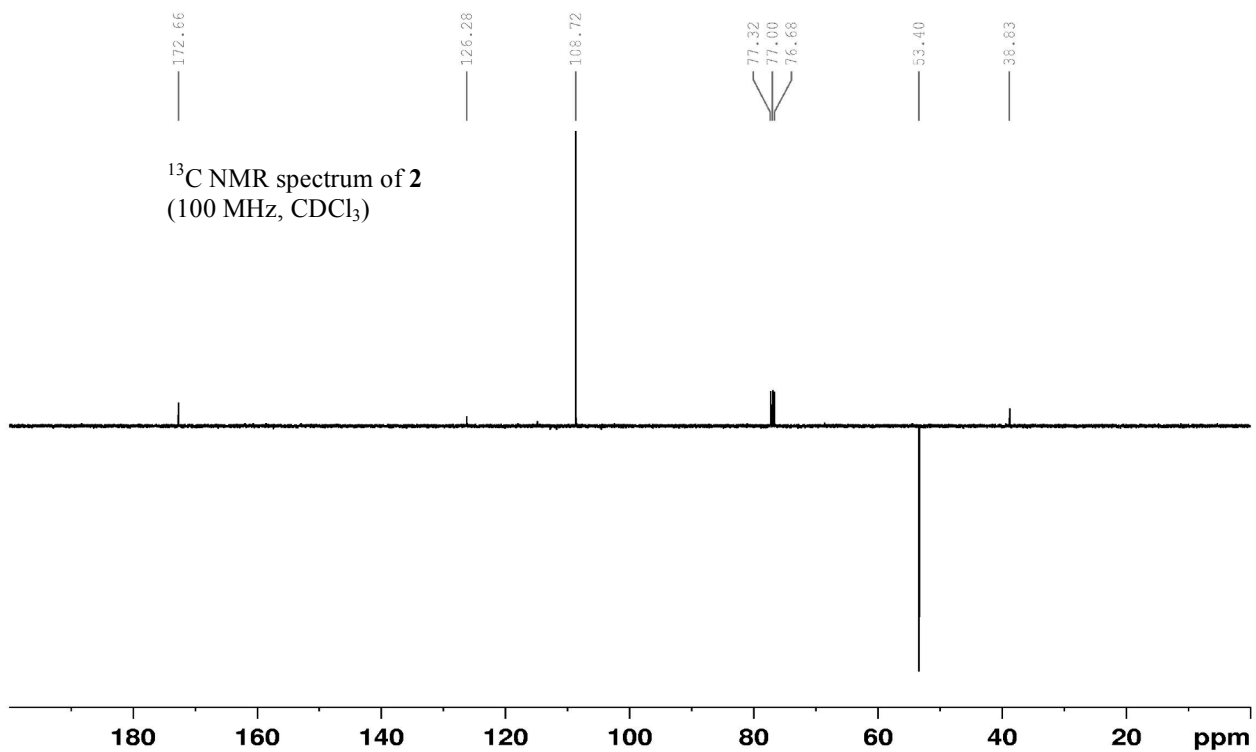

<sup>1</sup>H NMR spectrum of **3**  
(400 MHz, CDCl<sub>3</sub>)

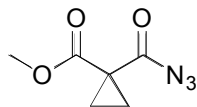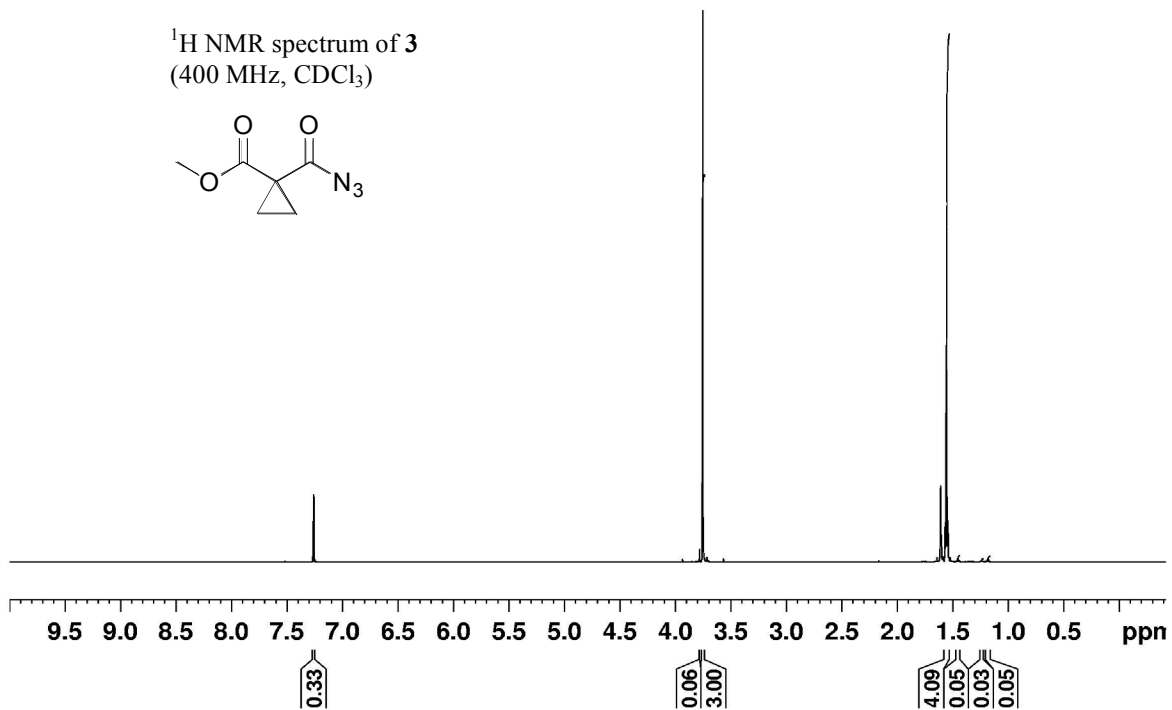

176.41  
169.40

<sup>13</sup>C NMR spectrum of **3**  
(100 MHz, CDCl<sub>3</sub>)

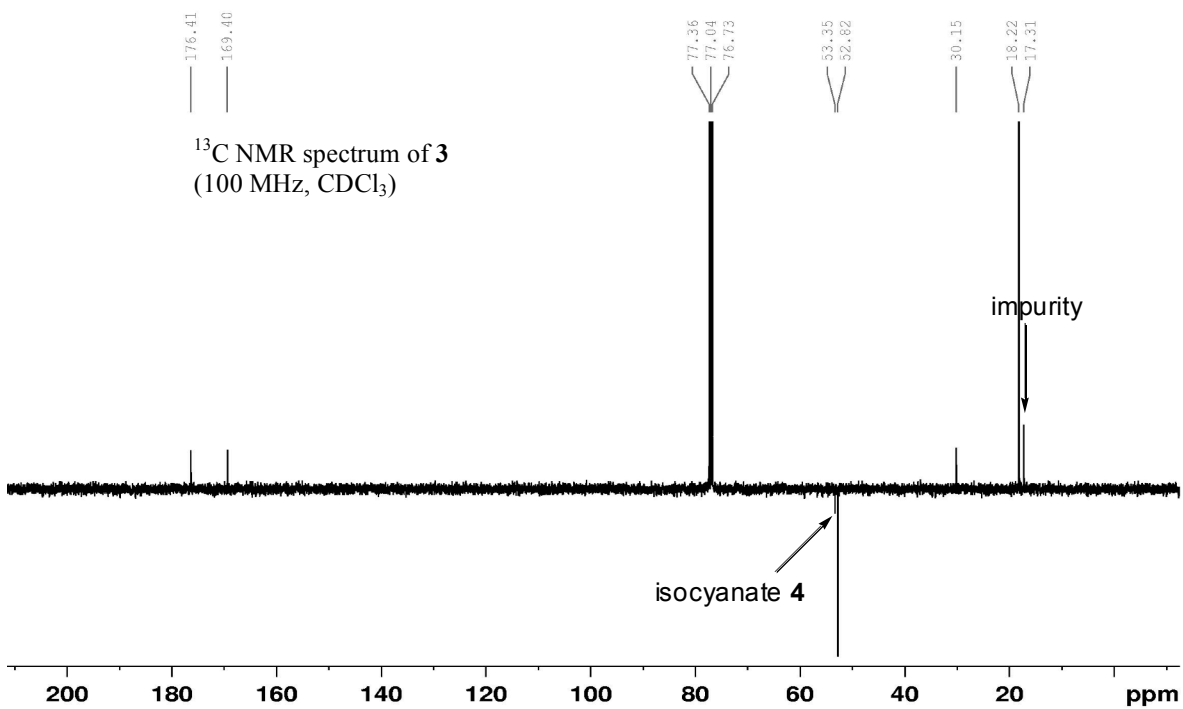

<sup>1</sup>H NMR spectrum of **4**  
(400 MHz, C<sub>7</sub>D<sub>8</sub>)

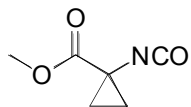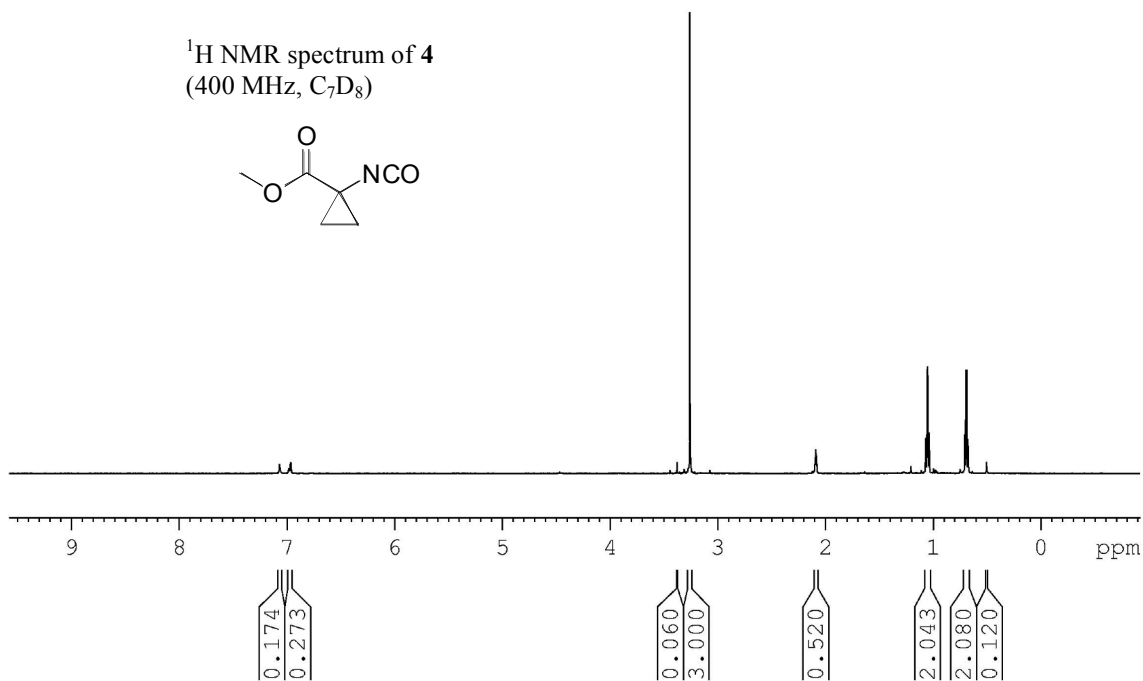

<sup>13</sup>C NMR spectrum of **4**  
(100 MHz, C<sub>7</sub>D<sub>8</sub>)

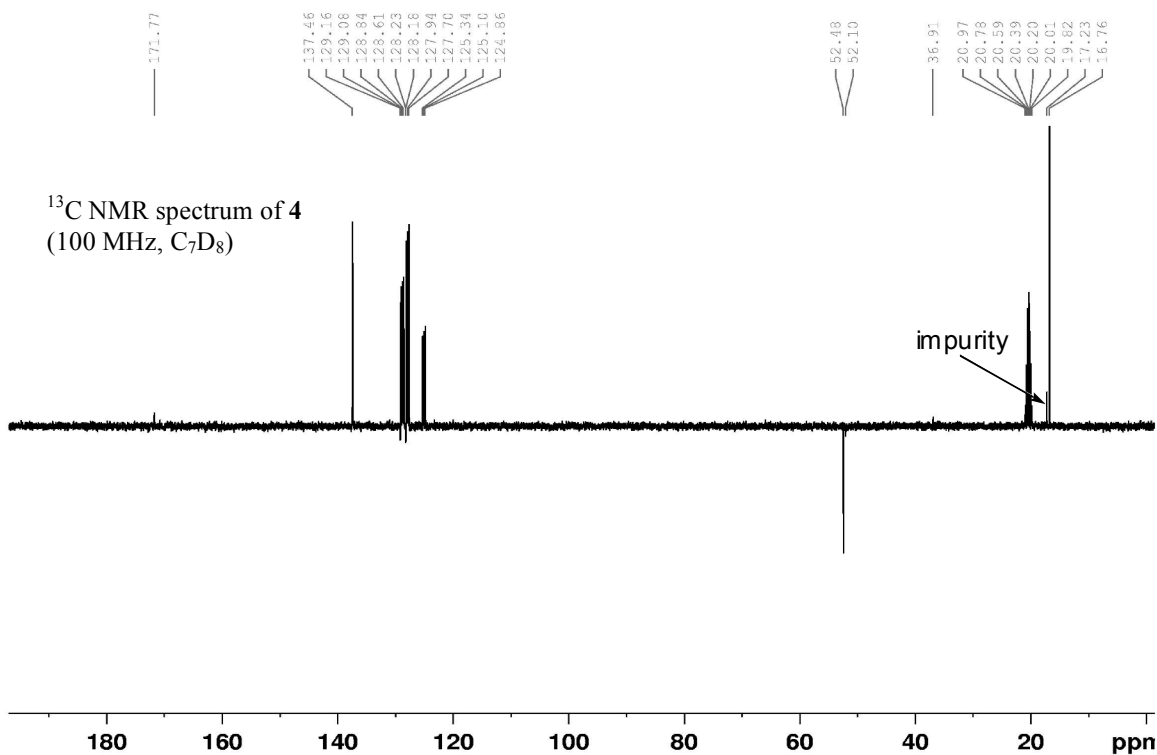

| acetyl azide | E, a.u.    | DE, kcal/mol | ZPE, a.u.  | Barrier,<br>kcal/mol |
|--------------|------------|--------------|------------|----------------------|
| GS           | -317.53605 | 0            | -317.47647 | 0                    |
| TS           | -317.48788 | 30.23        | -317.43257 | 27.55                |

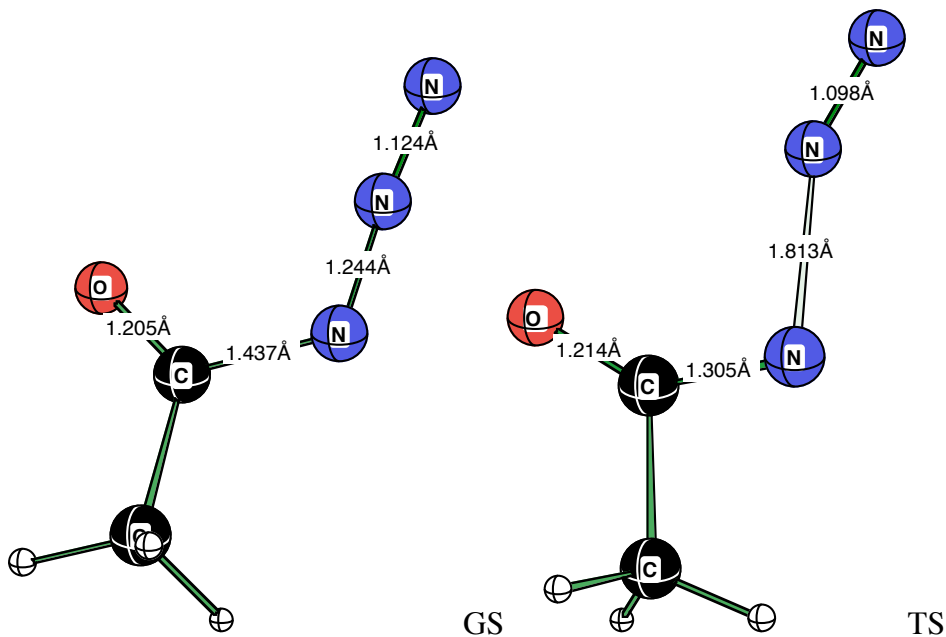

Acetyl azide Ground State RB3LYP/6-311+G(d,p)

Charge = 0 Multiplicity = 1

```

C -0.1008821349,-0.4337590153,2.1324000592
C 0.2771148443,0.0292130228,0.7528035242
O 1.2657367481,0.6556413803,0.4655023133
N -0.7074367443,-0.3747216005,-0.2120992967
N -0.4663964442,-0.0287584473,-1.3826828007
N -0.3365538708,0.2375739932,-2.4671575834
H 0.6619567099,-0.1194735796,2.8413826112
H -0.2017139272,-1.5218412926,2.1447825862
H -1.0708236086,-0.0151978327,2.4121725615

```

Acetylazide Transition Structure for loss of N<sub>2</sub>

RB3LYP/6-311+G(d,p) Im. Freq=509.2867i cm<sup>-1</sup>

Charge = 0 Multiplicity = 1

```

C -0.6542828072,0.0323763365,-2.1447463174
H -1.7160329973,0.2473457038,-2.0375825744
C 0.1796595321,-0.0714865305,-0.7983621182
O 1.3701225614,-0.304818668,-0.7629164407
N -0.8016824287,0.1595451938,0.0304585121

```

N -0.0117817893,0.0767784111,1.6604555812  
 N -0.0022744881,0.1253664568,2.7570885282  
 H -0.518013134,-0.9351393504,-2.6279645244  
 H -0.1690237666,0.8291737225,-2.7084891127

| acetyl nitrene | E, a.u.    | DE, kcal/mol | ZPE, a.u.  | Barrier,<br>kcal/mol |
|----------------|------------|--------------|------------|----------------------|
| GS             | -207.93650 | 0            | -207.88851 | 0                    |
| TS             | -207.91217 | 15.26        | -207.86662 | 13.74                |

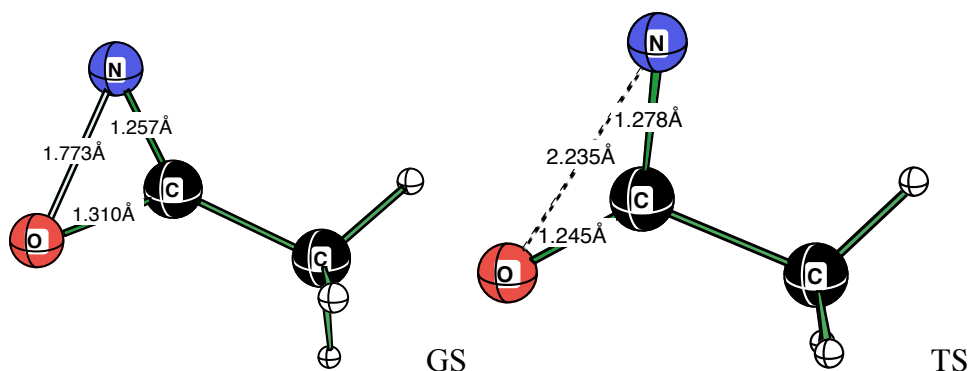

acetylnitrene ground state RB3LYP/6-311+G(d,p)

Charge = 0 Multiplicity = 1

C 0.0187463478,0.0000044098,0.0801360432  
 O -1.1956412404,-0.0000088949,-0.4112473716  
 N -0.5055188656,-0.0000195142,1.2221614571  
 C 1.3362987217,0.0000188468,-0.5789800018  
 H 2.1384315569,0.0000263888,0.1591605889  
 H 1.4175407738,-0.8847154902,-1.2156258222  
 H 1.4175192349,0.8847573205,-1.2156222424

Acetylazide transition state (nitrene rearrangement to isocyanate) RB3LYP/6-311+G(d,p)

Im. Freq.= 890.9822i cm<sup>-1</sup>

Charge = 0 Multiplicity = 1

C -0.6153974024,-0.0000122771,1.1837451189  
 H -1.7077974223,-0.001151382,1.0908360035  
 C 0.1157286307,-0.0000154801,-0.1680907365  
 O 1.3432579332,-0.0007586467,-0.3759907167  
 N -0.7767701588,0.0008719897,-1.0834265262  
 H -0.3023169167,0.9084817689,1.7029172485  
 H -0.3005453855,-0.9071985988,1.704231871

| benzoyl azide | E, a.u.    | DE, kcal/mol | ZPE, a.u.  | Barrier, kcal/mol |
|---------------|------------|--------------|------------|-------------------|
| GS            | -509.32046 | 0            | -509.20717 | 0                 |
| TS            | -509.26783 | 33.03        | -509.15931 | 30.03             |

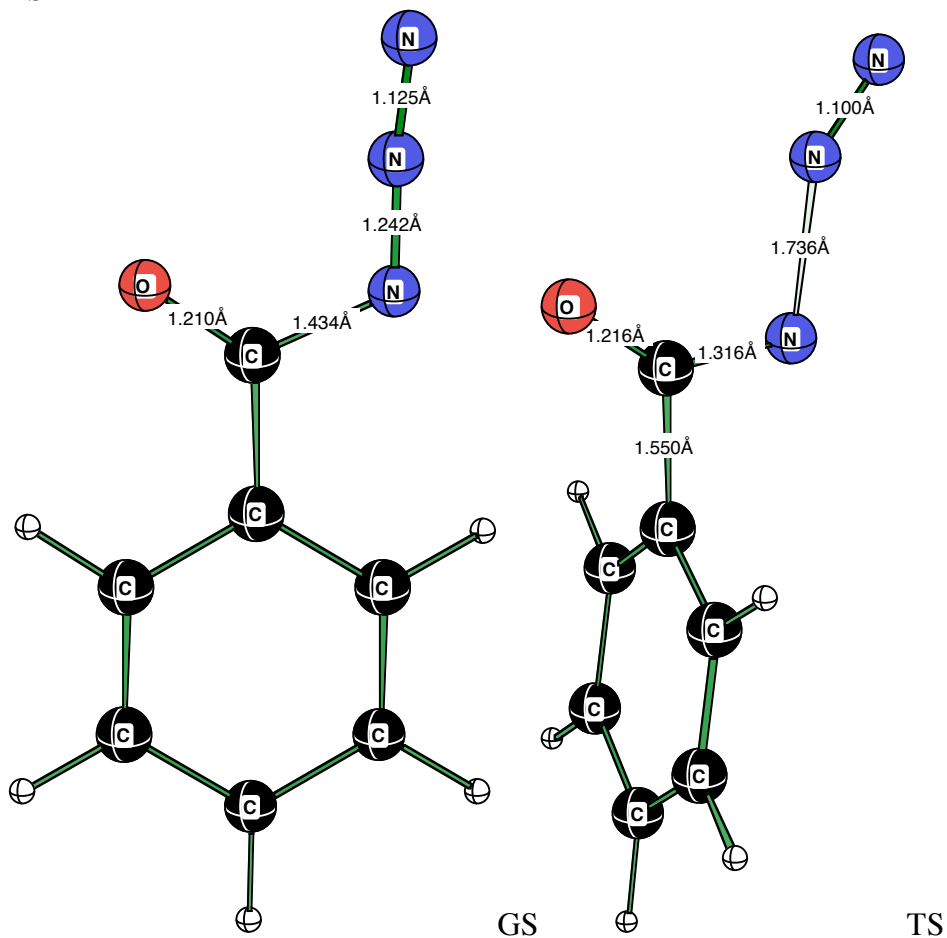

Ground state for Benzoylazide RB3LYP/6-311+G(d,p)

Charge = 0 Multiplicity = 1

C 0.6144195785,-0.0173132894,-0.8644780145  
 O 1.7923054917,0.0155416947,-1.1402054572  
 N -0.412426133,-0.1058561597,-1.8620588042  
 N 0.0009977712,-0.1461753105,-3.0322045754  
 N 0.2764912927,-0.1884957059,-4.1218271732  
 C 0.0659916197,0.0274469945,0.5146191912  
 C -1.3090746235,-0.0142329212,0.7770709178  
 C -1.7665887348,0.0311099551,2.0904918362  
 C -0.8581024262,0.1179049428,3.1449035948  
 C 0.5130455022,0.1596892229,2.8866657438  
 C 0.9753945112,0.1146854394,1.5770651093  
 H -2.009500971,-0.0813280406,-0.0452151252  
 H -2.8311186061,-0.001349111,2.2915783018



H -1.2175586504,0.1529936138,4.1672922154  
H 1.2186896614,0.2273274555,3.7065680566  
H 2.0350915544,0.1459706923,1.3560238075

Transition state for rearrangement of benzoylazide RB3LYP/6-311+G(d,p)

Im. Freq=569.3065i cm<sup>-1</sup>

Charge = 0 Multiplicity = 1

C 0.1641858003,0.5194430258,-0.9931772678  
O 0.3727989079,1.6300074447,-1.4413979835  
N 0.0168557994,-0.7019257224,-1.4606204718  
N 0.1834295546,-0.5659063079,-3.1831504173  
N 0.2013794645,-1.0117973422,-4.1884610283  
C -0.0173216182,0.1653920007,0.5049394539  
C -1.2869814368,0.2467102831,1.0827879914  
C -1.42242024,0.1027397001,2.4602156652  
C -0.2990140403,-0.143843296,3.250340656  
C 0.9635606456,-0.2489371103,2.6653530976  
C 1.1072485093,-0.1062253079,1.2886934652  
H -2.153444531,0.4321224477,0.4592029113  
H -2.4029518821,0.1757345308,2.916257265  
H -0.4085676627,-0.2617732729,4.3224264007  
H 1.8333134445,-0.4485247186,3.2805264974  
H 2.0820599196,-0.1918887109,0.8234758461

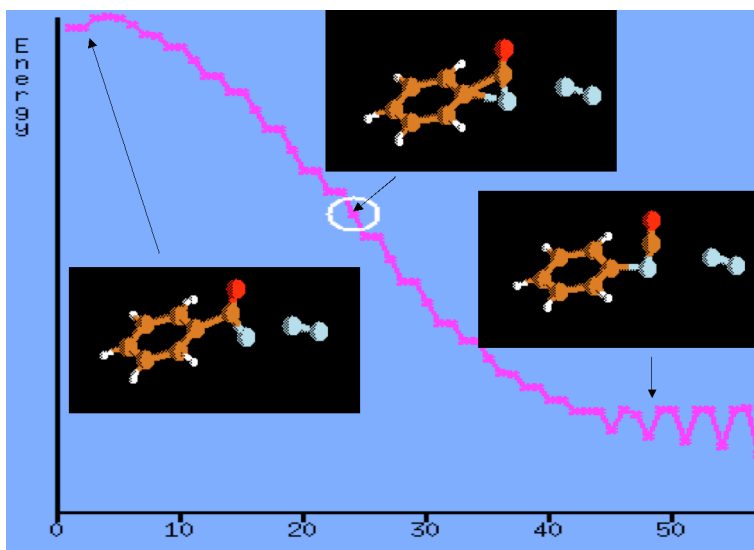

|                | E, a.u.    | DE, kcal/mol | ZPE, a.u.  | Barrier, kcal/mol |
|----------------|------------|--------------|------------|-------------------|
| pivaloyl azide |            |              |            |                   |
| TS             | -435.46065 | 0            | -435.32111 | 0                 |
| GS             | -435.50857 | 30.07        | -435.36472 | 27.36             |

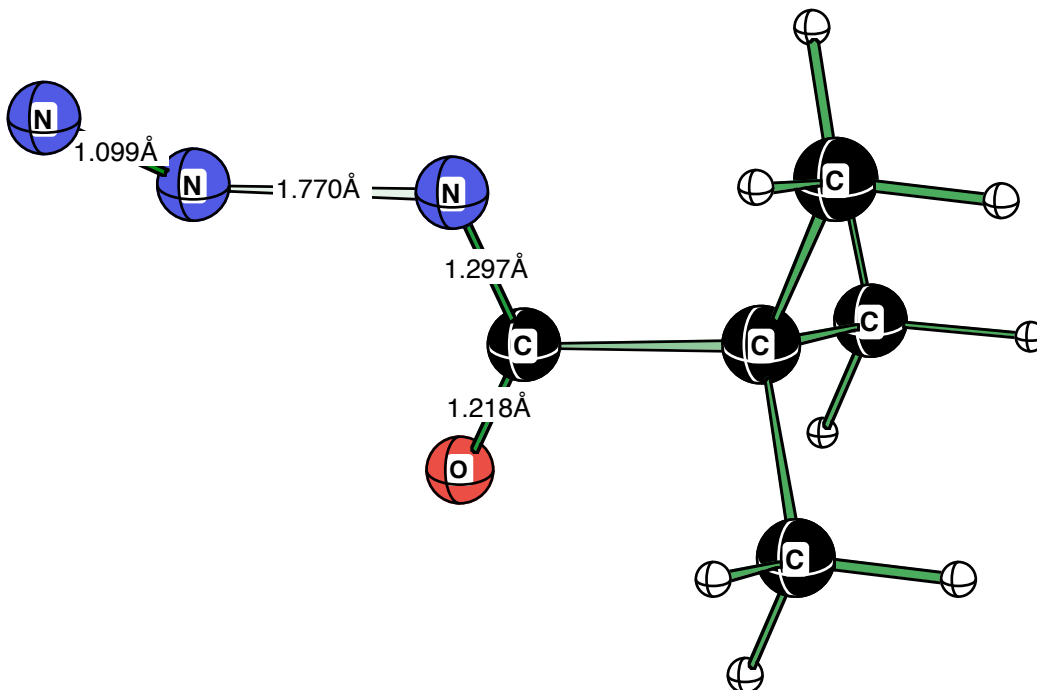

Transition state for rearrangement of pivaloyl azide: RB3LYP/6-311+G(d,p)

Im.Freq=542.5040icm-1

Charge = 0 Multiplicity = 1

C -0.161686149,0.0231402662,-1.2816712965  
 C 0.2923136843,0.3045534338,0.2695543937  
 O 1.0752379722,1.196359527,0.5417195591  
 N -0.3765008666,-0.6047911539,0.9090632609  
 N 0.0656875668,-0.3620480147,2.6052650347  
 N -0.0130872077,-0.6360096138,3.6669212333  
 C 1.1664630306,-0.260102783,-1.9994210177  
 H 1.6102369312,-1.1986490305,-1.6574641534  
 H 0.9740932562,-0.3507748387,-3.0734780395  
 H 1.8822797018,0.545591449,-1.8356061566  
 C -1.1550299863,-1.1237578885,-1.5359980743  
 H -1.3514935213,-1.1770324862,-2.6122289925  
 H -0.7566697559,-2.0883421237,-1.217944687  
 H -2.1064539693,-0.9615470888,-1.0273218058  
 C -0.7742839564,1.3600248441,-1.7253323371  
 H -0.0818718673,2.1852574258,-1.5582128472  
 H -1.0074391592,1.3034001242,-2.793629284  
 H -1.7039415805,1.5680145945,-1.1894072171

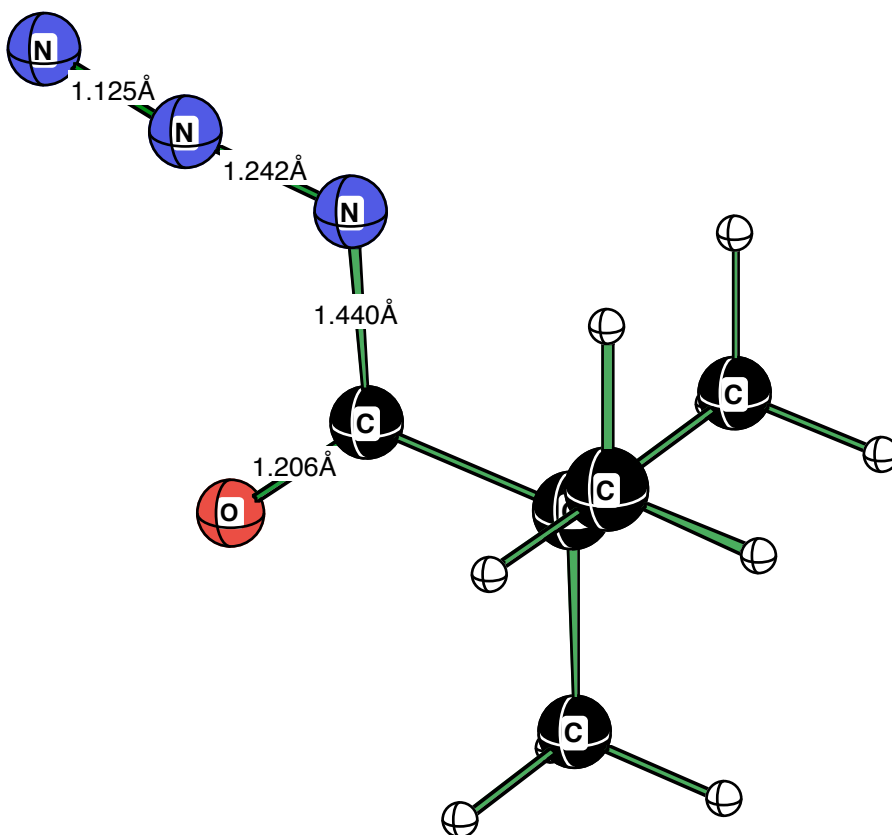

Ground state for pivaloyl azide RB3LYP/6-311+G(d,p)

Charge = 0 Multiplicity = 1

|   |               |               |               |
|---|---------------|---------------|---------------|
| C | -0.0724768022 | 1.2112859646  | -0.2260753675 |
| C | -0.0258215769 | -0.1632797295 | 0.4434740428  |
| O | -0.1117226916 | -0.3753632964 | 1.6270746085  |
| N | 0.1375250547  | -1.2213578603 | -0.5198320845 |
| N | 0.1827457087  | -2.3646034897 | -0.0374452422 |
| N | 0.2337635051  | -3.4329359903 | 0.311681865   |
| C | -0.2474181988 | 2.2833477091  | 0.8594351188  |
| H | 0.5795311419  | 2.2657918381  | 1.5718438264  |
| H | -0.2823413298 | 3.2717511161  | 0.3939464096  |
| H | -1.1713977024 | 2.132861503   | 1.4209468684  |
| C | 1.2489037354  | 1.4401609209  | -0.9934649798 |
| H | 1.2272639453  | 2.426942019   | -1.4642826567 |
| H | 2.1088981796  | 1.408594098   | -0.3187413882 |
| H | 1.3952899617  | 0.6913092375  | -1.7736729838 |
| C | -1.2632042725 | 1.2494408923  | -1.2099602175 |
| H | -2.2108569984 | 1.0806344756  | -0.6910213136 |
| H | -1.3099178985 | 2.2343192972  | -1.6829368219 |
| H | -1.1608249564 | 0.497249625   | -1.9939621574 |

| pivaloylnitrene | E, a.u.    | DE, kcal/mol | ZPE, a.u.  | Barrier, kcal/mol |
|-----------------|------------|--------------|------------|-------------------|
| TS              | -325.88811 | 0            | -325.75833 | 0                 |
| GS              | -325.91154 | 14.70        | -325.77927 | 13.14             |

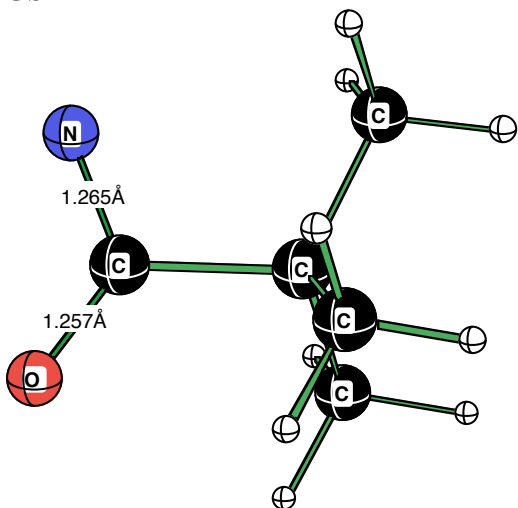

TS

pivaloyl nitrene (t-butyl acyl nitrene) t-butyl rearr TS

RB3LYP/6-311+G(d,p) Im.Freq= -946.5931i cm<sup>-1</sup>

Charge = 0 Multiplicity = 1

C 0.0525550135,-0.000025495,-1.0532546009  
O -0.9608420698,0.0000474075,-1.7966667515  
N 1.2370355178,-0.00013625,-1.4965652923  
C 0.0118213752,0.0000094307,0.5335938132  
C 1.4015395644,-0.0000994978,1.197099575  
H 1.9817323668,0.8866603046,0.9318876811  
H 1.2726883608,-0.0000665111,2.2834475614  
H 1.9815764069,-0.8869718489,0.9319229465  
C -0.7696168631,-1.2745734541,0.8895777633  
H -0.2037813486,-2.1740988355,0.6364205737  
H -0.9510597406,-1.2790923978,1.9701608847  
H -1.730550437,-1.3069704949,0.3748968575  
C -0.7693928787,1.2747436892,0.8895274603  
H -0.9508341253,1.2793376788,1.9701105427  
H -0.2033996385,2.1741595933,0.636333897  
H -1.730321179,1.3072889635,0.3748460474

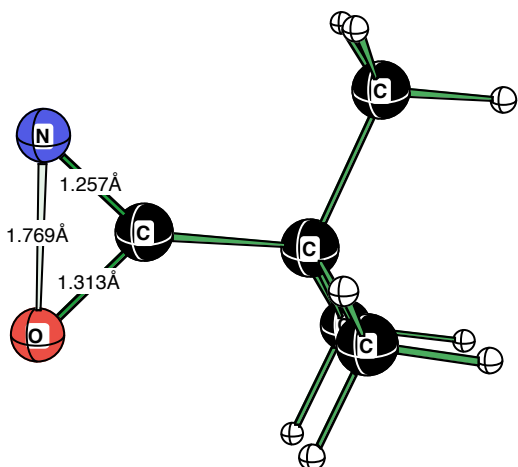

ground state for pivaloyl nitrene

RB3LYP/6-311+G(d,p)

Charge = 0 Multiplicity = 1

```

C   0.1323592365,0.0001604157,0.9083624674
O  -0.7687435476,0.0007397766,1.8637085384
N   0.9994266014,-0.0000627202,1.8189298919
C   0.0011770329,-0.0001140043,-0.578041258
C   1.4047050583,-0.0007742358,-1.2060868376
H   1.9728353352,-0.8863485605,-0.910295116
H   1.3204605072,-0.0010226533,-2.2956406135
H   1.9734767446,0.8845359287,-0.9107399343
C  -0.7867127034,1.2665778569,-0.979228659
H  -0.2473167624,2.1743063179,-0.6983037536
H  -0.9304569226,1.273901955,-2.0626790604
H  -1.7685973917,1.2895780798,-0.501909379
C  -0.7876335629,-1.2664179659,-0.9786519016
H  -0.9313751509,-1.2741319448,-2.0620999421
H  -0.2488981274,-2.1744079006,-0.6973059124
H  -1.7695364293,-1.2884827925,-0.5013267064

```

Recover connectivity data from disk.

dinitrogen (N2)

RCCSD(FC)/6-31G(d)

R(1,2) 1.1135 Å

RCCSD-FC/6-311+G(d,p)

R(1,2) 1.1032

Zero-point correction= 0.005487 (Hartree/Particle)

Thermal correction to Energy= 0.007847

Thermal correction to Enthalpy= 0.008791

Thermal correction to Gibbs Free Energy= -0.012959

Sum of electronic and zero-point Energies= -109.294584

Sum of electronic and thermal Energies= -109.292224

Sum of electronic and thermal Enthalpies= -109.291280

Sum of electronic and thermal Free Energies= -109.313030

SP\RCCSD(T)-FC\6-311+G(d,p)\N2:  
CCSD(T)=-109.315077 a.u.

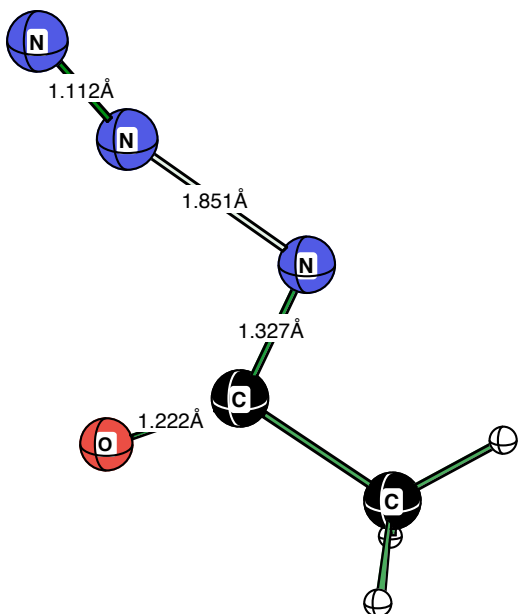

transition state for rearrangement of acetylazide to methyl isocyanate  
RCCSD-FC\6-31G(d)= -316.519603 a.u.

|   |           |           |           |
|---|-----------|-----------|-----------|
| 6 | 0.139192  | 0.000474  | -0.784629 |
| 8 | 1.348705  | 0.001709  | -0.611308 |
| 7 | -0.936668 | -0.000827 | -0.008019 |
| 6 | -0.555934 | 0.000031  | -2.178746 |
| 1 | -1.649496 | -0.001182 | -2.150968 |
| 1 | -0.202365 | 0.897827  | -2.692981 |
| 1 | -0.200380 | -0.896745 | -2.693390 |
| 7 | -0.142115 | -0.000448 | 1.663285  |
| 7 | 0.097721  | -0.000648 | 2.748670  |

---

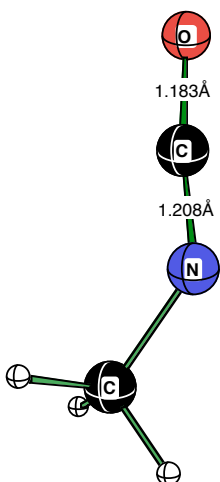

methylisocyanate

\FOpt\RCCSD-FC\6-31G(d)= -207.3930527

|   |           |           |           |
|---|-----------|-----------|-----------|
| 6 | -0.850791 | 0.018293  | -0.924161 |
| 1 | -1.863962 | 0.363325  | -1.142194 |
| 6 | 0.303825  | -0.002364 | 1.264156  |
| 8 | 1.103334  | -0.142909 | 2.125005  |
| 7 | -0.602784 | 0.197922  | 0.491087  |
| 1 | -0.769830 | -1.038265 | -1.201873 |
| 1 | -0.142193 | 0.603796  | -1.520039 |

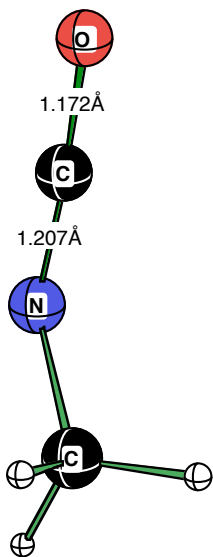

\FOpt\RCCSD-FC\6-311+G(d,p)= -207.5071014

|   |           |           |           |
|---|-----------|-----------|-----------|
| 6 | -0.800560 | 0.010359  | -1.535696 |
| 1 | -1.809241 | 0.349247  | -1.777568 |
| 6 | 0.341652  | -0.008397 | 0.636431  |
| 8 | 1.157348  | -0.161718 | 1.463947  |
| 7 | -0.580141 | 0.201625  | -0.113543 |
| 1 | -0.710244 | -1.047286 | -1.803495 |

1 -0.082742 0.593759 -2.121247  
\\SPARCCSD(T)-FC\\6-311+G(d,p)= -207.5362827 a.u.

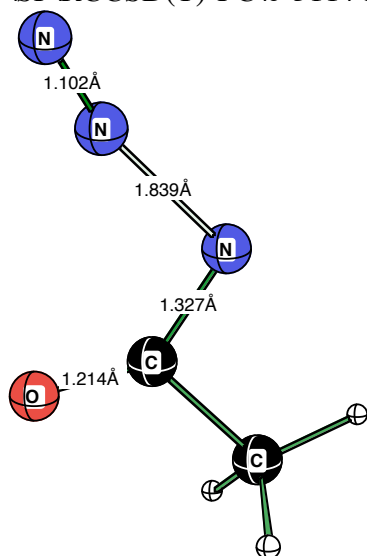

Transition state for rearrangement of acetylazide: geometry is ccsd 2YES +6cyc  
SPARCCSD(T)-FC\\6-311+G(d,p)

Charge = 0 Multiplicity = 1

C 0.1549317575,0.0006585259,-0.7953782986  
O 1.3579795309,0.0031723244,-0.6301428948  
N -0.9160979026,-0.0023177101,-0.0123634257  
C -0.540981894,0.0000238949,-2.1925074511  
H -1.6333522426,0.0000168148,-2.1606641599  
H -0.1843695285,0.8982347487,-2.7020739127  
H -0.1843420118,-0.8986275898,-2.7012898214  
N -0.1270629682,-0.0015357799,1.6486837357  
N 0.1080934929,-0.0003032377,2.7254633402  
CCSD=-316.6771052\\CCSD(T)=-316.7235659



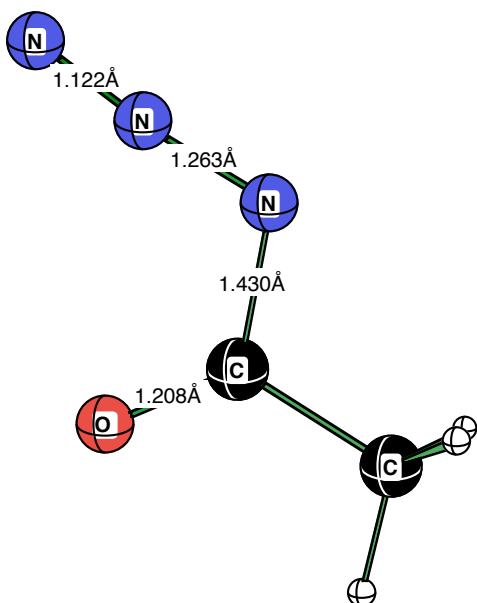

ground state for acetylazide: FOpt\RCCSD-FC\6-311+G(d,p)

CCSD=-316.71654

Charge = 0 Multiplicity = 1

C -0.5006452471,0.0000032685,2.1211261126  
 C 0.1592603145,-0.000460774,0.7644314005  
 O 1.3503302077,-0.0013130618,0.5652648433  
 N -0.8169633748,0.0004004747,-0.2798405936  
 N -0.2692023309,0.0005657129,-1.4176548087  
 N 0.1224763883,0.0008066768,-2.4694427895  
 H 0.2675931621,-0.0033124723,2.8955320432  
 H -1.1410536416,-0.8826446097,2.217797917  
 H -1.1350463652,0.8867965586,2.2197735577

\CCSD=-316.71654\CCSD(T)=-316.7654787

**Figure 4.** Cyclopropyl acyl azide *syn* and *anti* minima (**5a** and **5b**) and *syn*-TS-5 ( $\Delta E^\ddagger$

=29.3 kcal/mol) optimized at the B3LYP/6-311+G(d,p) level of theory.

RB3LYP/6-311+G(d,p) **5a E =-394.9419708**

Zero-point correction= 0.094543 (Hartree/Particle)

Thermal correction to Energy= 0.101955

Thermal correction to Enthalpy= 0.102899

Thermal correction to Gibbs Free Energy= 0.062083

Sum of electronic and zero-point Energies= -394.847428

Sum of electronic and thermal Energies= -394.840016

Sum of electronic and thermal Enthalpies= -394.839072

Sum of electronic and thermal Free Energies= -394.879887

Charge = 0 Multiplicity = 1  
 C,0,0.0501196739,0.8708625393,-2.3818069049  
 C,0,0.4058253297,0.9904281906,-0.9043634077  
 C,0,1.46402243,0.6797160695,-1.9566656026  
 H,0,-0.5126354786,-0.009618906,-2.6649233422  
 H,0,-0.2291255358,1.7885563715,-2.8840336651  
 H,0,0.4050978178,1.9758024994,-0.4589106295  
 H,0,2.1847359353,1.4622251067,-2.1582176392  
 H,0,1.8552804096,-0.3297387477,-1.9529232969  
 C,0,-0.0115710902,-0.11122043,-0.011527052  
 O,0,-0.0780347659,-1.2801178921,-0.3160445389  
 N,0,-0.3385416647,0.3803687565,1.2969241667  
 N,0,-0.699850157,-0.492768688,2.1059670017  
 N,0,-1.0372443328,-1.2054574118,2.9076149297

Figure 4. RB3LYP/6-311+G(d,p) **5b E= -394.940283**

|                                              |                             |
|----------------------------------------------|-----------------------------|
| Zero-point correction=                       | 0.094584 (Hartree/Particle) |
| Thermal correction to Energy=                | 0.101984                    |
| Thermal correction to Enthalpy=              | 0.102928                    |
| Thermal correction to Gibbs Free Energy=     | 0.062158                    |
| Sum of electronic and zero-point Energies=   | -394.845699                 |
| Sum of electronic and thermal Energies=      | -394.838300                 |
| Sum of electronic and thermal Enthalpies=    | -394.837355                 |
| Sum of electronic and thermal Free Energies= | -394.878125                 |

Charge = 0 Multiplicity = 1  
 C,0,-0.6846338568,-0.7452944281,-2.1018200521  
 C,0,-1.248342485,-0.0000026439,-0.8978434119  
 C,0,-0.6846440746,0.7452937618,-2.10182191  
 H,0,0.262512911,-1.2507528139,-1.9661737794  
 H,0,-1.4060499623,-1.2707880743,-2.7151082564  
 H,0,-2.3226899142,-0.0000098537,-0.7699214183  
 H,0,-1.4060673712,1.270776006,-2.7151114275  
 H,0,0.2624957159,1.250765518,-1.9661767591  
 C,0,-0.5413905335,0.0000038925,0.4006837285  
 O,0,-1.0857192247,-0.0000044281,1.4788470493  
 N,0,0.8917166802,0.0000044054,0.2483011208  
 N,0,1.5295488962,0.0000020232,1.3123523255  
 N,0,2.1858227262,-0.000005501,2.2259929993

**Figure 5.** Cyclopropyl and cyclopropenyl acyl azides (*syn-syn* and *syn-anti* minima (**6a** and **6b**) and the corresponding transition structures (*syn-syn*-**TS-6** (a second-order saddle point) and *syn-anti*-**TS-6**) optimized at the B3LYP/6-311+G(d,p) level of theory.

Figure 5. RB3LYP/6-311+G(d,p) *syn-syn* **6a** **E=-393.6658531**  
 Zero-point correction= 0.069220 (Hartree/Particle)  
 Thermal correction to Energy= 0.076563  
 Thermal correction to Enthalpy= 0.077507  
 Thermal correction to Gibbs Free Energy= 0.036914  
 Sum of electronic and zero-point Energies= -393.596633  
 Sum of electronic and thermal Energies= -393.589290  
 Sum of electronic and thermal Enthalpies= -393.588346  
 Sum of electronic and thermal Free Energies= -393.628939  
 Charge = 0 Multiplicity = 1  
 C,0,-1.5354869687,-0.6420640391,1.7220097686  
 C,0,-0.1680692972,-0.0000624165,1.6035058399  
 C,0,-1.5355954228,0.6417148438,1.721968216  
 H,0,0.5139322664,0.0000191014,2.4515570316  
 C,0,0.5846798419,-0.0000470475,0.3157113539  
 O,0,1.7889254568,0.0000683159,0.2319254099  
 N,0,-0.2874893872,-0.0000372058,-0.8297101667  
 N,0,0.2933877612,0.0000724913,-1.9258480031  
 N,0,0.7338808733,0.0003387557,-2.9614677288  
 H,0,-2.0386128383,1.5910527484,1.7664963489  
 H,0,-2.0383467329,-1.5914847086,1.7665535595

Figure 5. RB3LYP/6-311+G(d,p) **6b** **E=-393.6662627**  
 Zero-point correction= 0.069156 (Hartree/Particle)  
 Thermal correction to Energy= 0.076535  
 Thermal correction to Enthalpy= 0.077479  
 Thermal correction to Gibbs Free Energy= 0.036753  
 Sum of electronic and zero-point Energies= -393.597107  
 Sum of electronic and thermal Energies= -393.589728  
 Sum of electronic and thermal Enthalpies= -393.588784  
 Sum of electronic and thermal Free Energies= -393.629510  
 Charge = 0 Multiplicity = 1  
 C,0,2.2434943545,-1.3651443005,0.0989222006  
 C,0,0.9364872233,-0.9922958648,-0.5707197781  
 C,0,2.3601311667,-0.6472533246,-0.9578722367  
 H,0,0.3758854256,-1.7334635542,-1.1360743828  
 C,0,0.0899543771,0.0664944548,0.0550963363  
 O,0,0.4851150745,0.9894558366,0.7256815686  
 N,0,-1.2979927517,-0.1548153023,-0.2484205441

N,0,-2.0781644793,0.6833395762,0.234840168  
N,0,-2.8575328634,1.3916996463,0.6300198697  
H,0,2.944108963,-0.1060591404,-1.6804552858  
H,0,2.6545129463,-1.8884972285,0.9434415314

Figure 5. RB3LYP/6-311+G(d,p) *syn-syn*-TS-6 E= **-393.615401**  
**Im. Freq= 561.5487i cm<sup>-1</sup>; 20.5890i cm<sup>-1</sup>**

Zero-point correction= 0.064525 (Hartree/Particle)  
Thermal correction to Energy= 0.071907  
Thermal correction to Enthalpy= 0.072852  
Thermal correction to Gibbs Free Energy= 0.032112  
Sum of electronic and zero-point Energies= -393.550876  
Sum of electronic and thermal Energies= -393.543494  
Sum of electronic and thermal Enthalpies= -393.542549  
Sum of electronic and thermal Free Energies= -393.583289

Charge = 0 Multiplicity = 1

C,0,-2.5604407371,0.0191848189,-0.647521493  
C,0,-1.4284745091,-0.7007854761,0.0000697333  
C,0,-2.5606290846,0.0194350867,0.6471034718  
H,0,-1.3488553408,-1.7809251713,0.0002663927  
C,0,-0.0415202831,0.14006517,0.0003721488  
O,0,-0.0496037439,1.3560925938,0.0011940119  
N,0,0.8212160498,-0.8277833815,-0.0004965332  
N,0,2.4185283771,-0.0243477817,-0.0002467174  
N,0,3.5159786068,-0.0848631456,-0.0005899552  
H,0,-2.9991959343,0.312171618,1.5844975638  
H,0,-2.9987923259,0.311575367,-1.585126777

Figure 5. RB3LYP/6-311+G(d,p) *syn-anti*-TS-6 E= **-393.6165156**  
**Im. Freq= 606.7141i cm<sup>-1</sup>**

Zero-point correction= 0.064730 (Hartree/Particle)  
Thermal correction to Energy= 0.072806  
Thermal correction to Enthalpy= 0.073750  
Thermal correction to Gibbs Free Energy= 0.031020  
Sum of electronic and zero-point Energies= -393.551786  
Sum of electronic and thermal Energies= -393.543710  
Sum of electronic and thermal Enthalpies= -393.542766  
Sum of electronic and thermal Free Energies= -393.585495

C,0,-1.3269209789,0.155637066,-2.1024906908  
C,0,-0.5798890197,0.9820365477,-1.1056610754  
C,0,-0.2027010385,0.6435747688,-2.5128862958  
H,0,-0.9256923587,1.9729647779,-0.8145180449  
C,0,0.3569910075,0.3754220201,0.0219136606  
O,0,1.5568474094,0.5740529303,0.0634006059  
N,0,-0.5336916228,-0.2688613974,0.7284706776  
N,0,0.315861942,-0.9799925363,2.0348015742

N,0,0.3084898528,-1.5860702747,2.9538943278  
H,0,-2.2185091488,-0.4238270244,-2.2665316697  
H,0,0.5699212058,0.7628858481,-3.2515747815

**Figure 6.** Structures of **1**, **3** minima and their corresponding transition structures, **TS-1** and **TS-3**, optimized at the B3LYP/6-311+G(d,p) level of theory.

Figure 6. RB3LYP/6-311+G(d,p) **3** **E**= -622.8790512  
Zero-point correction= 0.136880 (Hartree/Particle)  
Thermal correction to Energy= 0.148782  
Thermal correction to Enthalpy= 0.149726  
Thermal correction to Gibbs Free Energy= 0.097360  
Sum of electronic and zero-point Energies= -622.742171  
Sum of electronic and thermal Energies= -622.730270  
Sum of electronic and thermal Enthalpies= -622.729325  
Sum of electronic and thermal Free Energies= -622.781691

Charge = 0 Multiplicity = 1  
C,0,-2.2503358503,-0.6237668688,0.628637202  
C,0,-0.8923540655,0.0559976507,0.4403276791  
C,0,-2.1024669883,0.8127044168,0.9834602603  
H,0,-2.7868318754,-0.8742573803,-0.2777432649  
H,0,-2.2847573896,-1.3559551435,1.4249088959  
H,0,-2.0629592244,1.0780541368,2.032179256  
H,0,-2.5161271622,1.5575429918,0.3162147042  
C,0,-0.5183595746,0.3252320662,-0.983260649  
O,0,-1.1013019624,1.0913373852,-1.7136630736  
N,0,0.5530084167,-0.5112355639,-1.4172778367  
N,0,0.9024370567,-0.3435325004,-2.598747471  
N,0,1.2953850292,-0.2704729565,-3.649681575  
C,0,0.1667904726,-0.2633123294,1.4547410486  
O,0,-0.00316351,-0.9616051345,2.4255893029  
O,0,1.3097755079,0.3938467464,1.1960675925  
C,0,2.3915793174,0.1751362052,2.1230593948  
H,0,2.107751823,0.5063525952,3.1225868257  
H,0,2.6549565607,-0.8826076577,2.1538270653  
H,0,3.2205535979,0.7669787821,1.7422345073

Figure 6. RB3LYP/6-311+G(d,p) **TS-3** **E**= -622.8302935  
( $\nu_i = 534.8i \text{ cm}^{-1}$ )  
Zero-point correction= 0.132401 (Hartree/Particle)  
Thermal correction to Energy= 0.145058

|                                              |             |
|----------------------------------------------|-------------|
| Thermal correction to Enthalpy=              | 0.146002    |
| Thermal correction to Gibbs Free Energy=     | 0.091895    |
| Sum of electronic and zero-point Energies=   | -622.697893 |
| Sum of electronic and thermal Energies=      | -622.685235 |
| Sum of electronic and thermal Enthalpies=    | -622.684291 |
| Sum of electronic and thermal Free Energies= | -622.738398 |

C,0,-0.5669100959,2.0498778719,-0.9693780739  
 C,0,-0.4616188087,0.8409913206,-0.0246282084  
 C,0,-0.8015432213,2.2433673462,0.4808606422  
 H,0,0.3572440258,2.4030047165,-1.4041932194  
 H,0,-1.4260486964,2.0353268305,-1.6279055732  
 H,0,-1.8213371151,2.3581508796,0.8266913101  
 H,0,-0.0407892746,2.7245587326,1.0820327148  
 C,0,0.8965412753,0.2733272335,0.5262961879  
 O,0,1.1375131391,0.0756982366,1.6985030708  
 N,0,1.4984850383,0.149847342,-0.6307612925  
 N,0,3.0946231934,-0.53310407,-0.2341799582  
 N,0,4.0777347723,-0.946712365,-0.4972851622  
 C,0,-1.5881967793,-0.1431271366,-0.1067593593  
 O,0,-2.7411254079,0.1801545219,-0.2754084032  
 O,0,-1.1703523551,-1.4085097752,0.018955822  
 C,0,-2.1925056919,-2.4236800737,-0.0317677142  
 H,0,-2.9168722431,-2.2703849415,0.768657911  
 H,0,-2.704185008,-2.3980414915,-0.9944581111  
 H,0,-1.6667957942,-3.3661143137,0.1006150966

Figure 6. RB3LYP/6-311+G(d,p) TS-1 E= -621.5594629  
( $\nu_i = 589.0i \text{ cm}^{-1}$ )

|                                              |                             |
|----------------------------------------------|-----------------------------|
| Zero-point correction=                       | 0.107027 (Hartree/Particle) |
| Thermal correction to Energy=                | 0.119638                    |
| Thermal correction to Enthalpy=              | 0.120582                    |
| Thermal correction to Gibbs Free Energy=     | 0.066451                    |
| Sum of electronic and zero-point Energies=   | -621.452436                 |
| Sum of electronic and thermal Energies=      | -621.439825                 |
| Sum of electronic and thermal Enthalpies=    | -621.438881                 |
| Sum of electronic and thermal Free Energies= | -621.493012                 |

Charge = 0 Multiplicity = 1  
 C,0,-2.1729441343,-0.8287172954,0.5942586448  
 C,0,-0.9037718705,-0.0312739686,0.4954871666  
 C,0,-2.2999498122,0.4305906074,0.8143913694  
 C,0,-0.3404122511,0.5146586803,-0.8932441304  
 O,0,-0.2598212825,1.6977418445,-1.1548494783  
 N,0,-0.1099467718,-0.6302994995,-1.4756699925  
 N,0,0.5098917123,-0.2431211598,-3.0478338966  
 N,0,0.9336858371,-0.562356752,-4.0116681052  
 C,0,0.1112867138,-0.1425939389,1.6078340596

O,0,-0.1853009997,-0.3866708586,2.7524092806  
 O,0,1.3625533304,0.062353438,1.1763922218  
 C,0,2.3990061303,-0.0048183249,2.1755387168  
 H,0,2.2268939605,0.7439249963,2.9494030363  
 H,0,2.423031257,-0.9961085501,2.6295629941  
 H,0,3.3251913753,0.197866396,1.6432793069  
 H,0,-2.8553468231,1.3217650161,1.0433616632  
 H,0,-2.553922253,-1.8314759292,0.523385805

Figure 6. RB3LYP/6-311+G(d,p) **1 E**= -621.6038235

Zero-point correction= 0.111337 (Hartree/Particle)  
 Thermal correction to Energy= 0.123267  
 Thermal correction to Enthalpy= 0.124211  
 Thermal correction to Gibbs Free Energy= 0.071553  
 Sum of electronic and zero-point Energies= -621.492487  
 Sum of electronic and thermal Energies= -621.480557  
 Sum of electronic and thermal Enthalpies= -621.479612  
 Sum of electronic and thermal Free Energies= -621.532270

Charge = 0 Multiplicity = 1

C,0,-2.3378815995,-0.4987857395,0.7087290537  
 C,0,-0.9559097991,0.0693361003,0.4679723285  
 C,0,-2.2075378837,0.7496637873,0.9751635288  
 C,0,-0.5517906115,0.3534301567,-0.957471108  
 O,0,-1.0594393324,1.1981435713,-1.6533272955  
 N,0,0.4501973477,-0.5557747283,-1.4170680687  
 N,0,0.8311017266,-0.371320076,-2.5860161269  
 N,0,1.2409979342,-0.2855168712,-3.6296875049  
 C,0,0.1222203563,-0.2723471823,1.4706749528  
 O,0,-0.0375929906,-1.0023709871,2.4177205673  
 O,0,1.2639935607,0.3905337424,1.2133664671  
 C,0,2.3612280616,0.1402405275,2.1135753165  
 H,0,2.0934787618,0.4345510033,3.1290211134  
 H,0,2.6249971539,-0.9178987914,2.1021095301  
 H,0,3.1844871521,0.745750245,1.7417564694  
 H,0,-2.575041842,1.697287266,1.3245479433  
 H,0,-2.9016613315,-1.4110845068,0.6380245014

**1 reactant mpw1pw91/6-31g(d) E =-621.2673054**

Zero-point correction= 0.114014 (Hartree/Particle)  
 Thermal correction to Energy= 0.125815  
 Thermal correction to Enthalpy= 0.126759  
 Thermal correction to Gibbs Free Energy= 0.074533  
 Sum of electronic and zero-point Energies= -621.153292  
 Sum of electronic and thermal Energies= -621.141490  
 Sum of electronic and thermal Enthalpies= -621.140546  
 Sum of electronic and thermal Free Energies= -621.192772

C,0,-2.3105396227,-0.5193306089,0.7175311188  
 C,0,-0.9428037872,0.0628001467,0.4673895184  
 C,0,-2.195276601,0.7366112831,0.9631687255  
 C,0,-0.5551461356,0.334716879,-0.9601756691  
 O,0,-1.1247947376,1.1270770927,-1.6721596291  
 N,0,0.4976069997,-0.5104767901,-1.4037961287  
 N,0,0.8369151487,-0.3302618959,-2.5834307226  
 N,0,1.2189134973,-0.2437490513,-3.6407984673  
 C,0,0.1296462443,-0.2561098576,1.4766867736  
 O,0,-0.0541781287,-0.9290812097,2.4623502842  
 O,0,1.2865983046,0.3513671665,1.1863233114  
 C,0,2.3481702914,0.1066741155,2.1082168965  
 H,0,2.0805594844,0.4662886833,3.1036408434  
 H,0,2.5669632149,-0.9612659839,2.1635106134  
 H,0,3.2058112528,0.6536651375,1.720658333  
 H,0,-2.5713395941,1.6881031863,1.2976394824  
 H,0,-2.8613497195,-1.4424530046,0.6617120426

**TS-1 mpw1pw91/6-31g(d) E =-621.2135792**

$\nu_i=629.847\text{icm}^{-1}$

|                                              |                             |
|----------------------------------------------|-----------------------------|
| Zero-point correction=                       | 0.109434 (Hartree/Particle) |
| Thermal correction to Energy=                | 0.121974                    |
| Thermal correction to Enthalpy=              | 0.122918                    |
| Thermal correction to Gibbs Free Energy=     | 0.069020                    |
| Sum of electronic and zero-point Energies=   | -621.104145                 |
| Sum of electronic and thermal Energies=      | -621.091606                 |
| Sum of electronic and thermal Enthalpies=    | -621.090661                 |
| Sum of electronic and thermal Free Energies= | -621.144559                 |

Charge = 0 Multiplicity = 1

C,0,-2.1515431332,-0.8272299203,0.5774280854  
 C,0,-0.8921955729,-0.0260714102,0.4847355792  
 C,0,-2.2814962524,0.4307505824,0.8139434689  
 C,0,-0.3404450946,0.5623238126,-0.8896748164  
 O,0,-0.2768597466,1.7470915625,-1.1387825687  
 N,0,-0.1136008841,-0.5909972881,-1.4410260021  
 N,0,0.5048582884,-0.2562557092,-3.0309861665  
 N,0,0.9077791333,-0.6591895796,-3.978580126  
 C,0,0.1230633513,-0.1516209697,1.5878718565  
 O,0,-0.1694479461,-0.4312478785,2.72602201  
 O,0,1.3650199695,0.0833888153,1.1608699849  
 C,0,2.3781441378,-0.0014221994,2.1629791812  
 H,0,2.1879154401,0.7201525449,2.9595010527  
 H,0,2.4078277955,-1.005104087,2.591056448  
 H,0,3.3126345229,0.2266503,1.6539258349



H,0,-2.8375205775,1.321821923,1.0495410736  
H,0,-2.5269757749,-1.8326620092,0.4915461149

**3 reactant mpw1pw91/6-31g(d) E=-622.5467333**

Zero-point correction= 0.140168 (Hartree/Particle)  
Thermal correction to Energy= 0.151889  
Thermal correction to Enthalpy= 0.152833  
Thermal correction to Gibbs Free Energy= 0.100971  
Sum of electronic and zero-point Energies= -622.406565  
Sum of electronic and thermal Energies= -622.394844  
Sum of electronic and thermal Enthalpies= -622.393900  
Sum of electronic and thermal Free Energies= -622.445762  
C,0,-2.2131501096,-0.6457068577,0.6419915026  
C,0,-0.8699775691,0.0481122743,0.4380057614  
C,0,-2.0886776794,0.7904706422,0.9678020431  
H,0,-2.7461383807,-0.9234271126,-0.2602529072  
H,0,-2.2288691191,-1.3631211372,1.4543413393  
H,0,-2.0480340656,1.0766562668,2.0124451062  
H,0,-2.5124520406,1.5160832488,0.2832924353  
C,0,-0.5245236931,0.3001215444,-0.9898986743  
O,0,-1.1902986601,0.9815154594,-1.7367690781  
N,0,0.6108197437,-0.4374136936,-1.4122497339  
N,0,0.9053463754,-0.2787544317,-2.6074070783  
N,0,1.2616846442,-0.206774755,-3.6744801175  
C,0,0.1759081601,-0.2408695925,1.4667402305  
O,0,-0.0364455075,-0.8485581026,2.4908907813  
O,0,1.3480329262,0.3272824414,1.167737861  
C,0,2.3836463461,0.1213960695,2.1286183507  
H,0,2.1019323271,0.5503328939,3.0920580574  
H,0,2.5790237642,-0.94462325,2.2572428618  
H,0,3.2599193725,0.6256363867,1.7253998174

**TS-3 mpw1pw91/6-31g(d) E = -622.4882168**

$\nu_i = 585.9788i \text{ cm}^{-1}$

Zero-point correction= 0.135349 (Hartree/Particle)  
Thermal correction to Energy= 0.147900  
Thermal correction to Enthalpy= 0.148845  
Thermal correction to Gibbs Free Energy= 0.095002  
Sum of electronic and zero-point Energies= -622.352868  
Sum of electronic and thermal Energies= -622.340316  
Sum of electronic and thermal Enthalpies= -622.339372  
Sum of electronic and thermal Free Energies= -622.393215  
Charge = 0 Multiplicity = 1  
C,0,-0.5504066817,2.0431984427,-0.9450372712  
C,0,-0.4475867185,0.8315961383,-0.0178742421  
C,0,-0.8178378029,2.2186806414,0.494031538

H,0,0.380149153,2.4112630453,-1.3580792234  
 H,0,-1.3965850316,2.0194310883,-1.6225612159  
 H,0,-1.849187111,2.3083702257,0.8179672379  
 H,0,-0.0786644735,2.7015887249,1.1229919345  
 C,0,0.9006527062,0.2863544396,0.5723005659  
 O,0,1.1519231178,0.1394299675,1.7477582532  
 N,0,1.4501697877,0.1284343173,-0.5987048352  
 N,0,3.0641486067,-0.5501543875,-0.261020418  
 N,0,4.0330707992,-0.9510856821,-0.6065236937  
 C,0,-1.5629122642,-0.1536919368,-0.1261814722  
 O,0,-2.706759097,0.1645549289,-0.3612370658  
 O,0,-1.154225048,-1.408345097,0.0632941742  
 C,0,-2.1795354075,-2.3994353483,-0.0122702166  
 H,0,-2.9477770044,-2.211137723,0.7396534694  
 H,0,-2.6398992192,-2.3969579412,-1.0019231952  
 H,0,-1.681515438,-3.3482498102,0.1773573166

**Figure 8.** *Anti*-acyl cyclopropene singlet nitrene (**A**) and *syn* and *anti* acyl cyclopropene triplet nitrenes (**B**, **C**)

Figure 8. (A)

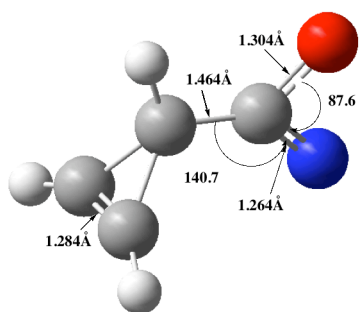

MP2/CBSB3

Charge = 0 Multiplicity = 1

C -1.4050483972,-0.6431672144,1.0186090713  
 C -0.0405041805,-0.0005503907,0.8604939314  
 C -1.4057826671,0.6403036419,1.0193135203  
 H 0.6766963956,-0.0007443015,1.6796434757  
 C 0.5880016057,0.0008323621,-0.461890508  
 O 1.8395563984,0.0013814337,-0.8282146107  
 N 0.2840722389,0.0012388651,-1.6884021583  
 H -1.9017375793,1.592721825,1.0737402928  
 H -1.8999138417,-1.5962114425,1.0719921352

|              |             |             |           |
|--------------|-------------|-------------|-----------|
| Temperature= | 298.150000  | Pressure=   | 1.000000  |
| E(ZPE)=      | 0.057124    | E(Thermal)= | 0.062941  |
| E(SCF)=      | -282.388267 | DE(MP2)=    | -1.042918 |

DE(CBS)= -0.098480 DE(MP34)= -0.030456  
 DE(CCSD)= -0.041527 DE(Int)= 0.033173  
 DE(Empirical)= -0.044994  
 CBS-QB3 (0 K)= -283.556345 CBS-QB3 Energy= -283.550528  
 CBS-QB3 Enthalpy= -283.549584 CBS-QB3 Free Energy= -283.585700

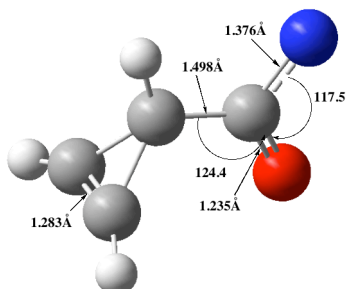

Figure 8. (B)

Charge = 0 Multiplicity = 3

C 0.0394490861,0.6416179178,1.6513455301  
 C -0.6663033627,-0.0016924768,0.473858031  
 C 0.0427903376,-0.6411643892,1.6513992801  
 H -1.7541639599,-0.0044354535,0.4239491439  
 C 0.0157266787,-0.0000273926,-0.8600612274  
 O 1.2401108001,0.002404963,-1.017793379  
 N -0.7694857257,-0.0013050945,-1.9897874712  
 H 0.3189256152,-1.5904889691,2.0739595635  
 H 0.3107755848,1.5924184249,2.0737009401

Temperature= 298.150000 Pressure= 1.000000  
 E(ZPE)= 0.056154 E(Thermal)= 0.061965  
 E(SCF)= -282.467518 DE(MP2)= -0.944650  
 DE(CBS)= -0.094433 DE(MP34)= -0.047632  
 DE(CCSD)= -0.040058 DE(Int)= 0.030103  
 DE(Empirical)= -0.044829  
 CBS-QB3 (0 K)= -283.552862 CBS-QB3 Energy= -283.547051  
 CBS-QB3 Enthalpy= -283.546106 CBS-QB3 Free Energy= -283.583489

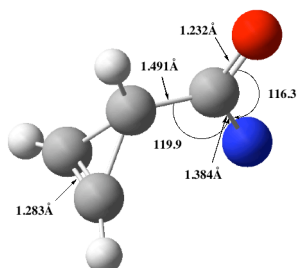

Figure 8. (C)

Charge = 0 Multiplicity = 3

C 0.044701 -0.641594 -1.664233  
 C -0.651783 -0.000044 -0.475199

|                   |             |                      |             |  |  |
|-------------------|-------------|----------------------|-------------|--|--|
| C                 | 0.044628    | 0.641614             | -1.664220   |  |  |
| H                 | -1.739334   | -0.000118            | -0.408576   |  |  |
| C                 | -0.006020   | 0.000020             | 0.868253    |  |  |
| O                 | -0.631382   | -0.000010            | 1.929973    |  |  |
| N                 | 1.373791    | 0.000024             | 0.970678    |  |  |
| H                 | 0.292219    | 1.589983             | -2.106779   |  |  |
| H                 | 0.292475    | -1.589920            | -2.106781   |  |  |
| Temperature=      | 298.150000  | Pressure=            | 1.000000    |  |  |
| E(ZPE)=           | 0.056227    | E(Thermal)=          | 0.062022    |  |  |
| E(SCF)=           | -282.467105 | DE(MP2)=             | -0.945115   |  |  |
| DE(CBS)=          | -0.094410   | DE(MP34)=            | -0.047506   |  |  |
| DE(CCSO)=         | -0.039857   | DE(Int)=             | 0.030149    |  |  |
| DE(Empirical)=    | -0.044749   |                      |             |  |  |
| CBS-QB3 (0 K)=    | -283.552365 | CBS-QB3 Energy=      | -283.546571 |  |  |
| CBS-QB3 Enthalpy= | -283.545627 | CBS-QB3 Free Energy= | -283.582839 |  |  |

**Figure 9.** Minimum (*syn-anti-6b*) and transition structure (*syn-anti-TS6b*) for the Curtius rearrangement and the loss of N<sub>2</sub> (TS-7) from acyl cyclopropenyl azide at the CBS-QB3 level of theory.

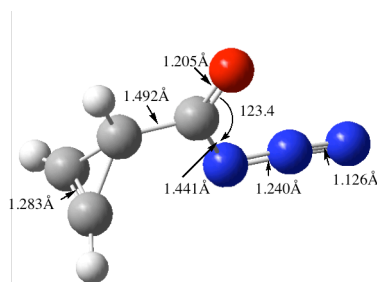

Figure 9. *syn-anti-6b* MP2/CBSB3

Charge = 0 Multiplicity = 1

|              |             |             |           |  |  |
|--------------|-------------|-------------|-----------|--|--|
| C            | -1.534592   | -0.641883   | 1.721116  |  |  |
| C            | -0.167737   | -0.000044   | 1.603629  |  |  |
| C            | -1.534706   | 0.641533    | 1.721200  |  |  |
| H            | 0.515064    | -0.000046   | 2.451192  |  |  |
| C            | 0.587748    | 0.000118    | 0.316832  |  |  |
| O            | 1.789860    | 0.000103    | 0.233904  |  |  |
| N            | -0.286802   | 0.000014    | -0.828746 |  |  |
| N            | 0.290803    | 0.000031    | -1.925919 |  |  |
| N            | 0.730187    | 0.000145    | -2.962879 |  |  |
| H            | -2.038914   | 1.590228    | 1.761979  |  |  |
| H            | -2.038631   | -1.590674   | 1.761748  |  |  |
| Temperature= | 298.150000  | Pressure=   | 1.000000  |  |  |
| E(ZPE)=      | 0.068680    | E(Thermal)= | 0.076063  |  |  |
| E(SCF)=      | -391.390271 | DE(MP2)=    | -1.441333 |  |  |
| DE(CBS)=     | -0.135226   | DE(MP34)=   | -0.015408 |  |  |
| DE(CCSO)=    | -0.051542   | DE(Int)=    | 0.044643  |  |  |

DE(Empirical)= -0.060799  
 CBS-QB3 (0 K)= -392.981256 CBS-QB3 Energy= -392.973873  
 CBS-QB3 Enthalpy= -392.972929 CBS-QB3 Free Energy= -393.013611

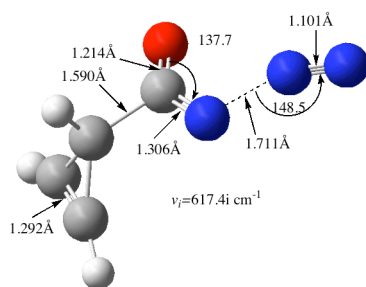

Figure 9. *syn-anti-TS6b*

Frequencies -- -617.3645 cm-1 (B3LYP/CBSB7)

Temperature= 298.150000 Pressure= 1.000000  
 E(ZPE)= 0.064200 E(Thermal)= 0.072304  
 E(SCF)= -391.354984 DE(MP2)= -1.409699  
 DE(CBS)= -0.132529 DE(MP34)= -0.031998  
 DE(CCSO)= -0.053248 DE(Int)= 0.044334  
 DE(Empirical)= -0.060665  
 CBS-QB3 (0 K)= -392.934588 CBS-QB3 Energy= -392.926485  
 CBS-QB3 Enthalpy= -392.925541 CBS-QB3 Free Energy= -392.968338

Charge = 0 Multiplicity = 1

|   |           |           |           |
|---|-----------|-----------|-----------|
| C | -1.319859 | 0.152306  | -2.101932 |
| C | -0.589000 | 0.981435  | -1.096203 |
| C | -0.204567 | 0.663744  | -2.506545 |
| H | -0.951388 | 1.963488  | -0.796167 |
| C | 0.366231  | 0.364095  | 0.014278  |
| O | 1.570562  | 0.518955  | 0.010541  |
| N | -0.528709 | -0.237691 | 0.751602  |
| N | 0.315812  | -0.966512 | 2.048243  |
| N | 0.284443  | -1.573143 | 2.967031  |
| H | -2.199072 | -0.443955 | -2.272205 |
| H | 0.568316  | 0.800777  | -3.241663 |

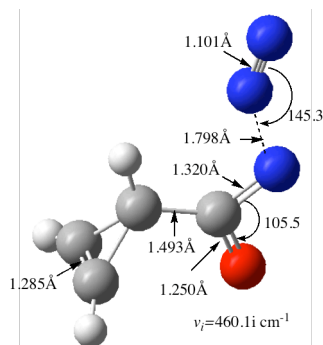

Figure 9. TS-7

Frequencies -- -460.1230

Temperature= 298.150000 Pressure= 1.000000  
 E(ZPE)= 0.064411 E(Thermal)= 0.072435

E(SCF)= -391.347892 DE(MP2)= -1.406212  
 DE(CBS)= -0.132049 DE(MP34)= -0.037014  
 DE(CCSO)= -0.054929 DE(Int)= 0.044329  
 DE(Empirical)= -0.060629  
 CBS-QB3 (0 K)= -392.929984 CBS-QB3 Energy= -392.921960  
 CBS-QB3 Enthalpy= -392.921016 CBS-QB3 Free Energy= -392.963268  
 Charge = 0 Multiplicity = 1  
 C -2.193294 -0.786232 -0.642252  
 C -0.829370 -0.679022 -0.000084  
 C -2.193173 -0.786495 0.642297  
 H -0.153391 -1.531404 -0.000321  
 C -0.197982 0.673365 0.000131  
 O -0.839729 1.745549 0.000391  
 N 1.073981 1.024435 0.000099  
 N 2.126668 -0.433487 -0.000265  
 N 3.165142 -0.800122 -0.000411  
 H -2.698717 -0.804032 1.590799  
 H -2.699016 -0.803381 -1.590666

**Figure 10.** *Anti-anti* and *anti-syn*-acyl cyclopropyl azides **8** (*anti-anti-8* and *anti-syn-8*) and the *anti-syn*-TS-**8** for Curtius rearrangement and *anti-syn*-TS-**8a** for loss of N<sub>2</sub> to produce cyclopropyl acyl nitrene.

*anti-anti-8*

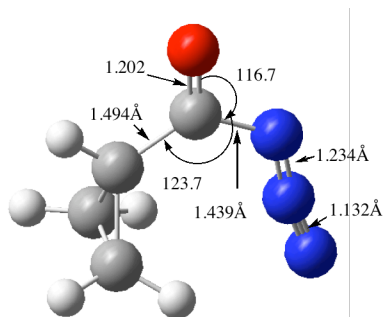

Temperature= 298.150000 Pressure= 1.000000  
 E(ZPE)= 0.093679 E(Thermal)= 0.101096  
 E(SCF)= -392.602599 DE(MP2)= -1.477300  
 DE(CBS)= -0.138759 DE(MP34)= -0.022297  
 DE(CCSO)= -0.049802 DE(Int)= 0.045942  
 DE(Empirical)= -0.064018  
 CBS-QB3 (0 K)= -394.215153 CBS-QB3 Energy= -394.207736  
 CBS-QB3 Enthalpy= -394.206792 CBS-QB3 Free Energy= -394.247448  
 Charge = 0 Multiplicity = 1  
 C -0.6284400325,1.6062335692,-0.7476856227  
 C -1.2196512011,0.4213809693,-0.0000130498  
 C -0.627860187,1.6059353611,0.747734102  
 H -2.3000752338,0.3576539085,0.0004349122

C -0.660572079,-0.9643174774,-0.0003661219  
 O -1.3806120814,-1.9262646244,0.0005815484  
 N 0.7561952024,-1.2182181229,-0.0007828589  
 N 1.6111749895,-0.3283334561,-0.0001331052  
 N 2.5197940428,0.3466730928,0.0004539954  
 H -1.3363497207,2.2357379021,1.270590777  
 H -1.3373256145,2.2362665508,-1.2697285312  
 H 0.3133297162,1.4823693377,-1.2650568053  
 H 0.3143088585,1.4818441655,1.2643251951

*anti-syn-8*

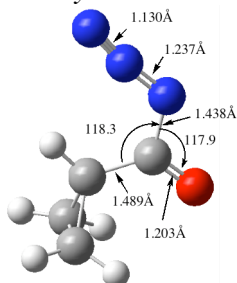

|                   |             |                      |             |
|-------------------|-------------|----------------------|-------------|
| Temperature=      | 298.150000  | Pressure=            | 1.000000    |
| E(ZPE)=           | 0.093677    | E(Thermal)=          | 0.101130    |
| E(SCF)=           | -392.612860 | DE(MP2)=             | -1.473705   |
| DE(CBS)=          | -0.138707   | DE(MP34)=            | -0.023042   |
| DE(CCSA)=         | -0.049569   | DE(Int)=             | 0.045842    |
| DE(Empirical)=    | -0.064084   |                      |             |
| CBS-QB3 (0 K)=    | -394.222449 | CBS-QB3 Energy=      | -394.214996 |
| CBS-QB3 Enthalpy= | -394.214052 | CBS-QB3 Free Energy= | -394.255322 |

Charge = 0 Multiplicity = 1

C -0.6952705089,-0.7438673292,-2.0226739459  
 C -0.5707073876,-0.0001927446,-0.6991886373  
 C -0.6952095829,0.7438994863,-2.0224495134  
 H -1.4390509913,-0.0002473194,-0.0533849437  
 C 0.7723731503,-0.000367454,-0.0568388267  
 O 1.8074022073,0.0002375911,-0.6691957275  
 N 0.8402188833,0.0000295701,1.3796573785  
 N -0.2061733375,0.0001104574,2.0396147443  
 N -1.0742428853,0.0002360648,2.7633483105  
 H -1.6249712164,1.2707570254,-2.1965699332  
 H -1.6250767682,-1.2705963677,-2.196943066  
 H 0.2017492655,-1.2434391601,-2.3650972904  
 H 0.2018521718,1.2434961797,-2.3647275491

**8(synC-N, synC-C)**

Temperature= 298.150000 Pressure= 1.000000  
E(ZPE)= 0.093766 E(Thermal)= 0.101210  
E(SCF)= -392.625269 DE(MP2)= -1.467565  
DE(CBS)= -0.138428 DE(MP34)= -0.025139  
DE(CCSO)= -0.048693 DE(Int)= 0.045657  
DE(Empirical)= -0.064212  
CBS-QB3 (0 K)= -394.229883 CBS-QB3 Energy= -394.222439  
CBS-QB3 Enthalpy= -394.221495 CBS-QB3 Free Energy= -394.262364

Charge = 0 Multiplicity = 1

C 2.0602096718,0.7436281812,-2.1322563825  
C 2.0068817873,-0.0004745043,-0.8042828418  
C 2.0600161705,-0.7449092487,-2.1320785524  
H 2.8907512457,-0.0005163384,-0.1813448143  
C 0.7161781497,-0.0002173771,-0.0817236928  
O -0.3769169609,-0.0001787253,-0.5968408035  
N 0.9195407196,-0.0001283017,1.339030847  
N -0.1234228027,0.000036413,2.0163761267  
N -1.0060182934,0.0001927795,2.7137602376  
H 2.9795477097,-1.2717093036,-2.3539104068  
H 2.9798782917,1.2701364865,-2.354212691  
H 1.1477450573,1.2446917583,-2.4294315518  
H 1.1474212538,-1.2458068195,-2.4291334743

**8(synC-N, antiC-C)**

Temperature= 298.150000 Pressure= 1.000000  
E(ZPE)= 0.093795 E(Thermal)= 0.101232  
E(SCF)= -392.623063 DE(MP2)= -1.468636  
DE(CBS)= -0.138434 DE(MP34)= -0.025058  
DE(CCSO)= -0.048667 DE(Int)= 0.045652  
DE(Empirical)= -0.064201  
CBS-QB3 (0 K)= -394.228612 CBS-QB3 Energy= -394.221174  
CBS-QB3 Enthalpy= -394.220230 CBS-QB3 Free Energy= -394.261058

Charge = 0 Multiplicity = 1

C 2.0455031854,0.7397500851,-2.1651818271  
C 1.99056613,0.0017857147,-0.8339932467  
C 2.0692380694,-0.7503707254,-2.1560203562  
H 2.877593672,0.0197006567,-0.2148962302  
C 0.7561316835,-0.0129765268,-0.0186523662  
O 0.7275436606,-0.0063437523,1.186453515  
N -0.43605749,-0.0366848562,-0.8318800857  
N -1.5012204158,-0.0499760282,-0.1973139963  
N -2.511064764,-0.0633319544,0.2995181141  
H 3.0017461575,-1.2623259723,-2.3583954868  
H 2.9612701982,1.2786045818,-2.3740772362  
H 1.1366301082,1.2280479381,-2.491220675



H 1.1764358051,-1.2713401608,-2.4758401226

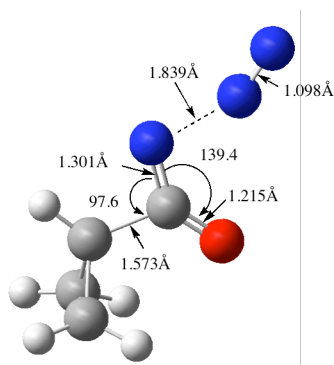

*anti-syn*-TS-8 for Curtius rearrangement

Frequencies -- -478.5237

|                   |             |                      |             |
|-------------------|-------------|----------------------|-------------|
| Temperature=      | 298.150000  | Pressure=            | 1.000000    |
| E(ZPE)=           | 0.089158    | E(Thermal)=          | 0.097377    |
| E(SCF)=           | -392.595387 | DE(MP2)=             | -1.428891   |
| DE(CBS)=          | -0.135317   | DE(MP34)=            | -0.044313   |
| DE(CCSO)=         | -0.050234   | DE(Int)=             | 0.045286    |
| DE(Empirical)=    | -0.064139   |                      |             |
| CBS-QB3 (0 K)=    | -394.183837 | CBS-QB3 Energy=      | -394.175618 |
| CBS-QB3 Enthalpy= | -394.174674 | CBS-QB3 Free Energy= | -394.217528 |

C 0.000542434,-0.7576377924,-2.4400886159

C -0.6591657952,-0.0003070047,-1.3212121002

C -0.0004618084,0.7580453772,-2.4399881809

H -1.7387775941,-0.0010218166,-1.2703273324

C 0.1667447054,0.0001550092,0.0173410073

O 1.3818003917,0.0009613842,0.0455487444

N -0.8405415835,-0.0005677217,0.8410524627

N -0.0467178244,-0.0001453152,2.5002288947

N -0.1001916143,-0.000271153,3.596835102

H 0.9488793719,-1.2306570639,-2.2198744896

H 0.947247105,1.2322947339,-2.2197156675

H -0.6451509195,1.2883463131,-3.1298937937

H -0.6434428688,-1.28870095,-3.130065031

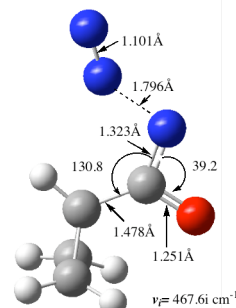

*anti-syn-TS-8a* for loss of N<sub>2</sub> to produce cyclopropyl acyl nitrene.

Frequencies -- -467.5585

|                   |             |                      |             |
|-------------------|-------------|----------------------|-------------|
| Temperature=      | 298.150000  | Pressure=            | 1.000000    |
| E(ZPE)=           | 0.089539    | E(Thermal)=          | 0.097619    |
| E(SCF)=           | -392.581150 | DE(MP2)=             | -1.433511   |
| DE(CBS)=          | -0.135350   | DE(MP34)=            | -0.046314   |
| DE(CCSO)=         | -0.052086   | DE(Int)=             | 0.045369    |
| DE(Empirical)=    | -0.064033   |                      |             |
| CBS-QB3 (0 K)=    | -394.177537 | CBS-QB3 Energy=      | -394.169457 |
| CBS-QB3 Enthalpy= | -394.168513 | CBS-QB3 Free Energy= | -394.211043 |

Charge = 0 Multiplicity = 1

|   |                |                |               |
|---|----------------|----------------|---------------|
| C | -0.722686015,  | 0.7450814589,  | 2.1048102432  |
| C | -0.6323858449, | 0.0000070826,  | 0.7811338998  |
| C | -0.722702087,  | -0.7450539366, | 2.1048165756  |
| H | -1.50433961,   | 0.0000140104,  | 0.1427634476  |
| C | 0.6919926496,  | -0.00001087,   | 0.1255951552  |
| O | 1.7893284813,  | -0.000022307,  | 0.7253712019  |
| N | 1.0230130047,  | -0.0000188958, | -1.1557866024 |
| N | -0.4378777911, | -0.0000041955, | -2.1996676505 |
| N | -0.8159624168, | -0.0000026727, | -3.2338509582 |
| H | 0.1817054955,  | -1.2439857231, | 2.4294456934  |
| H | 0.1817320961,  | 1.2439966805,  | 2.429435456   |
| H | -1.6470288115, | 1.272876391,   | 2.3031272252  |
| H | -1.647056151,  | -1.2728273386, | 2.3031383133  |
